# Supplementary material for: Phytoregionalisation of the Andean páramo
Source: PeerJ journal article supplement (doi:10.7717/peerj.4786), 2018-06-01
Supplement: Peyre-etal_Supplement-S2.pdf [file Peyre-etal_Supplement-S2.pdf]

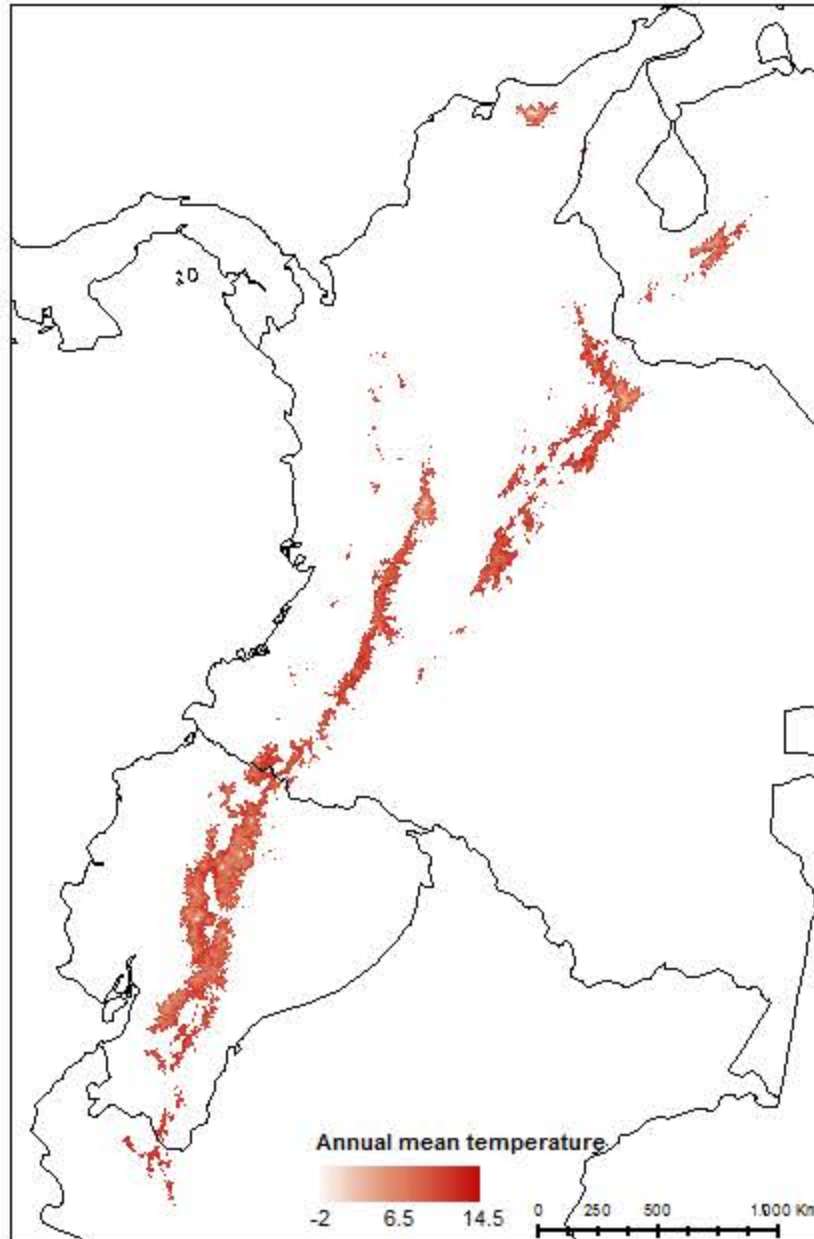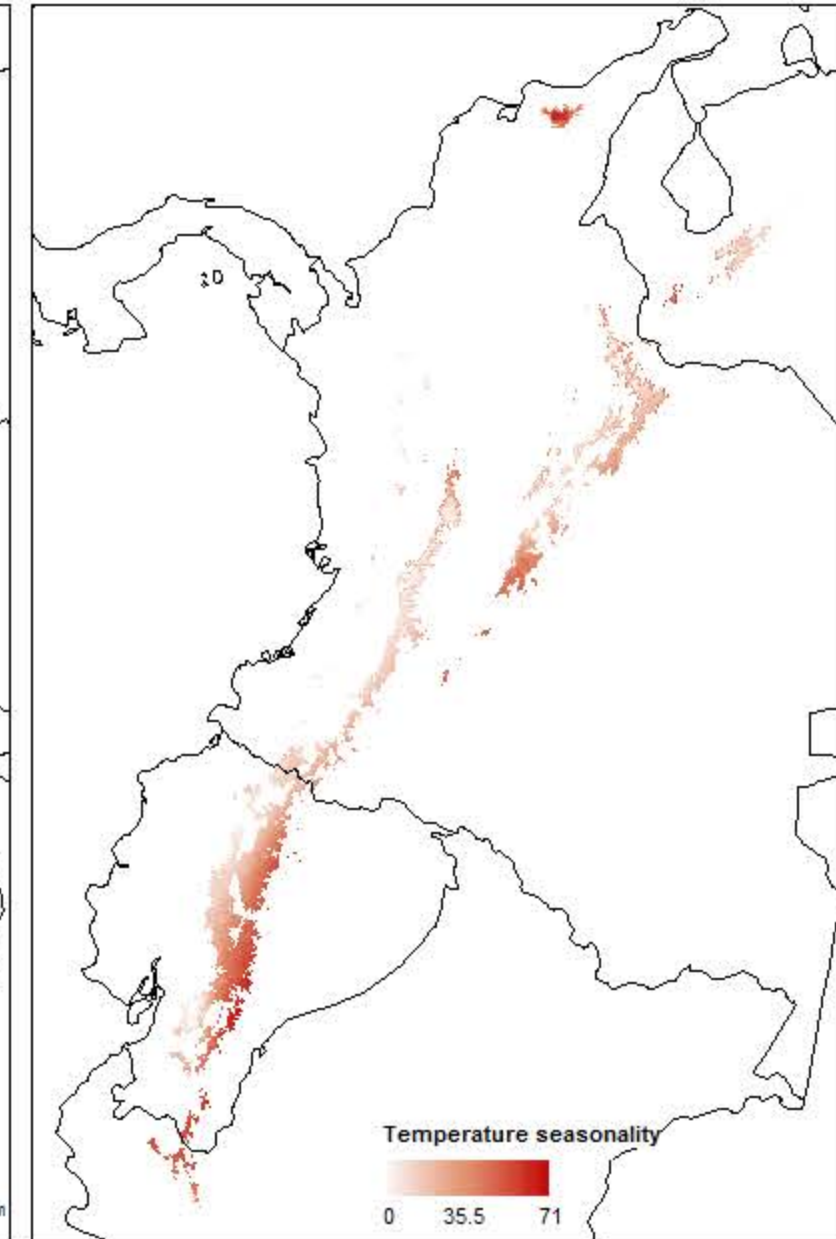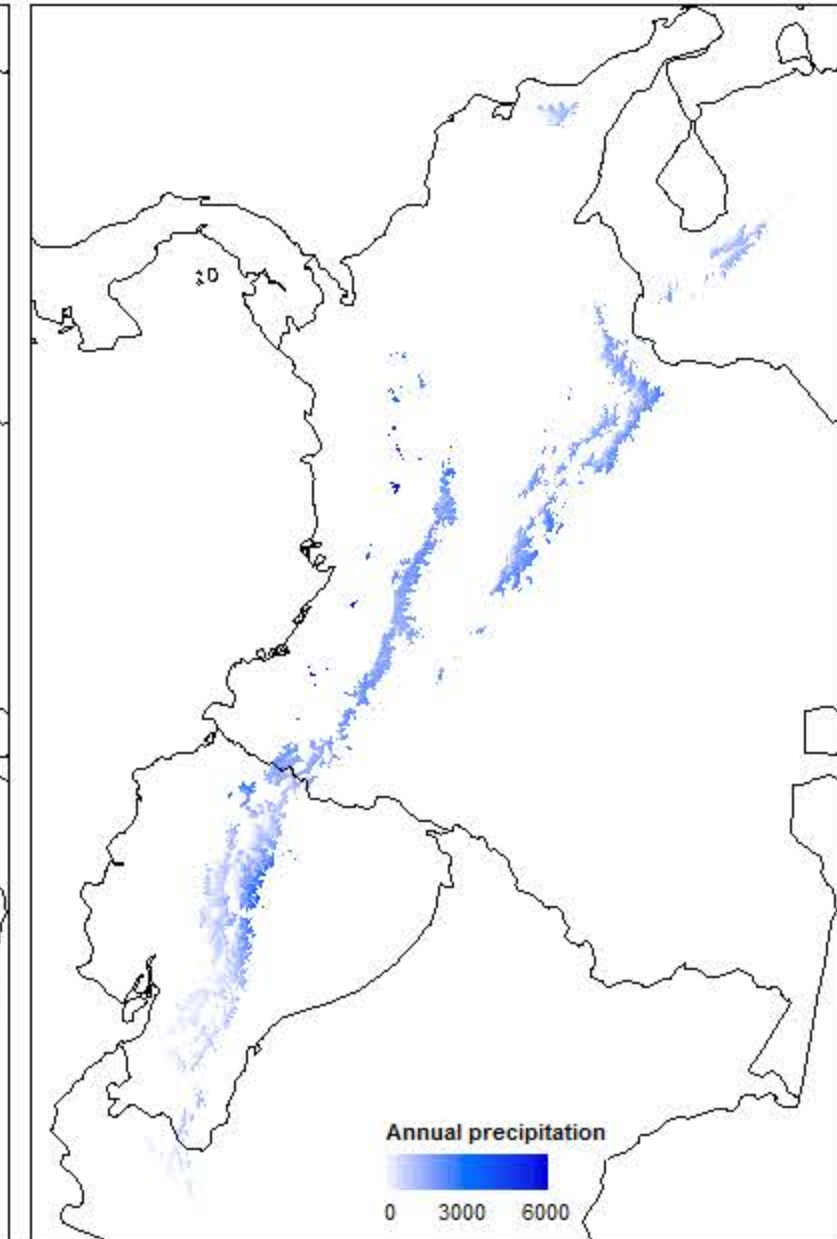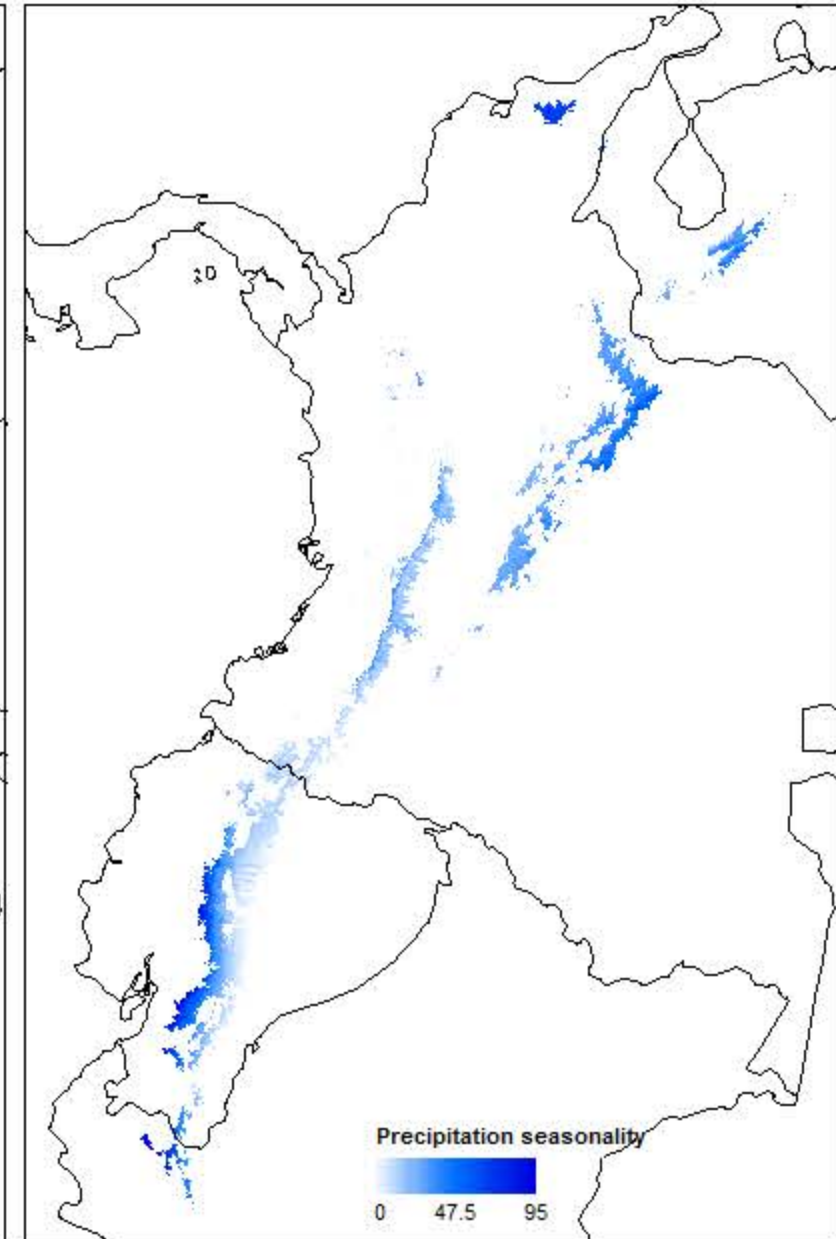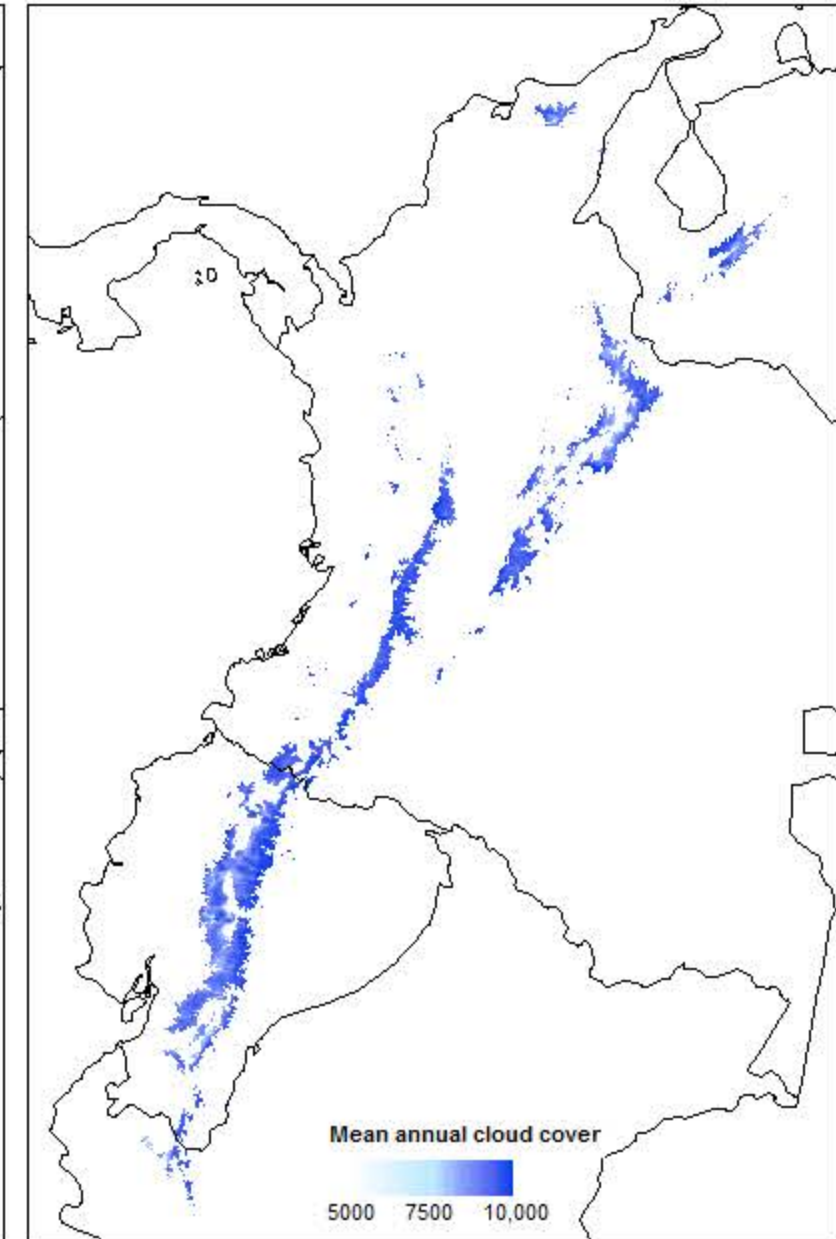

Supplemental information SI. 2 to Peyre et al. Phytoregionalisation of the Andean páramo
