# Supplementary material for: Phytoregionalisation of the Andean páramo
Source: PeerJ journal article supplement (doi:10.7717/peerj.4786), 2018-06-01
Supplement: Peyre-etal_Supplement-S3.pdf [file Peyre-etal_Supplement-S3.pdf]

**Supplemental information SI. 3 to Peyre et al. Phytoregionalisation of the Andean páramo**

| Cluster | VegPáramo plot | Latitude    | Longitude    | Elevation | Locality                            | Province/Department | Country   |
|---------|----------------|-------------|--------------|-----------|-------------------------------------|---------------------|-----------|
| Mid1    | A.P00361       | 6,4718766   | -76,089749   | 3500      | Páramo de Frontino                  | Antioquía           | Colombia  |
| Mid1    | A.P00463       | 1,2695569   | -77,8348304  | 3470      | Volcán Cumbal                       | Nariño              | Colombia  |
| Mid1    | A.P00599       | 5,0971077   | -76,0690706  | 3490      | Páramo de Tatamá                    | Risaralda           | Colombia  |
| Mid1    | A.P00778       | 6,0983581   | -72,9715197  | 4220      | Páramo de Guantiva                  | Boyacá              | Colombia  |
| Mid1    | A.P00875       | 5,9721771   | -73,0803491  | 3725      | Páramo La Rusia                     | Boyacá              | Colombia  |
| Mid1    | A.P01546       | 4,5723086   | -73,8055798  | 3350      | Parque Nacional Natural de Chingaza | Cundinamarca        | Colombia  |
| Mid1    | A.P02062       | 4,7993092   | -75,455418   | 4400      | Nevado de Santa Rosa                | Risaralda           | Colombia  |
| Mid2    | A.P00877       | 6,0620252   | -72,9264994  | 3605      | Páramo de Guantiva                  | Boyacá              | Colombia  |
| Mid2    | A.P01572       | 5,5916304   | -72,8470102  | 3400      | Páramo de la Sarna                  | Boyacá              | Colombia  |
| Mid2    | A.P02723       | 8,0272293   | -71,970799   | 3273      | Páramo las Rosas                    | Táchira             | Venezuela |
| Mid2    | A.P02787       | 7,9554126   | -72,0841539  | 3120      | Páramo el Zumbador                  | Tachira             | Venezuela |
| Mid3    | A.P00868       | 5,9812498   | -73,0893482  | 3800      | Páramo de la Rusia                  | Boyacá              | Colombia  |
| Mid3    | A.P00879       | 5,55928308  | -72,69863956 | 3605      | Páramo de Tota                      | Boyacá              | Colombia  |
| Mid3    | A.P00883       | 4,567875413 | -74,05369948 | 4110      | Sierra Nevada del Cocuy             | Boyacá              | Colombia  |
| Mid3    | A.P01901       | 4,2833978   | -74,2115066  | 3440      | Macizo de Sumapaz                   | Cundinamarca        | Colombia  |
| Mid3    | A.P01919       | 3,9395696   | -74,1307799  | 3540      | Macizo de Sumapaz                   | Meta                | Colombia  |
| Mid4    | A.P00432       | 1,079906    | -77,7179298  | 3960      | Volcán Azufral                      | Nariño              | Colombia  |
| Mid4    | A.P00441       | 0,835758    | -77,9242017  | 3800      | Volcán Chiles                       | Nariño              | Colombia  |
| Mid4    | A.P00853       | 6,0173516   | -73,0711605  | 3795      | Páramo de la Rusia                  | Boyacá              | Colombia  |
| Mid4    | A.P00858       | 5,9791032   | -72,5476129  | 3620      | Páramo de Pisva                     | Boyacá              | Colombia  |
| Mid4    | A.P00870       | 6,098117    | -72,9082983  | 3765      | Páramo de Guantiva                  | Boyacá              | Colombia  |
| Mid4    | A.P01414       | 2,8990279   | -76,1471856  | 3700      | Páramo de Santo Domingo             | Cauca               | Colombia  |
| Mid4    | A.P01511       | 4,4998446   | -73,7426125  | 3650      | Parque Nacional Natural de Chingaza | Cundinamarca        | Colombia  |
| Mid4    | A.P01918       | 4,2833104   | -74,1304098  | 3750      | Macizo de Sumapaz                   | Cundinamarca        | Colombia  |
| Mid4    | A.P02575       | -0,347923   | -78,2016842  | 3945      | Páramo de Papallacta                | Pichincha           | Ecuador   |
| Mid4    | A.P02758       | 9,0207505   | -70,5238626  | 3383      | Páramo de Guirigay                  | Trujillo            | Venezuela |
| Mid5    | A.P00471       | 1,2695371   | -77,8527859  | 3600      | Volcán Cumbal                       | Nariño              | Colombia  |
| Mid6    | A.P00422       | 1,2158082   | -77,3498839  | 4050      | Volcán Galeras                      | Nariño              | Colombia  |
| Mid6    | A.P02578       | 0,1310185   | -78,2735403  | 3774      | Laguna de Mojanda                   | Imbabura            | Ecuador   |
| Mid6    | A.P02633       | -0,6554095  | -78,6774031  | 3787      | Cerro Iliniza                       | Cotopaxi            | Ecuador   |
| Mid6    | A.P02645       | -0,5197949  | -78,6325616  | 3742      | Cerro Corazón                       | Pichincha           | Ecuador   |
| Mid9    | A.P02327       | -0,3027429  | -78,2106729  | 4000      | Cerro Guamaní                       | Pichincha           | Ecuador   |
| Mid9    | A.P02353       | 0,3659949   | -78,3183774  | 3600      | Volcán Cotacachi                    | Imbabura            | Ecuador   |
| Sub2    | A.P00465       | 1,070869    | -77,7179218  | 3520      | Volcán Azufral                      | Nariño              | Colombia  |
| Sub2    | A.P00673       | 10,2565651  | -72,941308   | 3077      | Montaña de Perijá                   | César               | Colombia  |
| Sub2    | A.P00864       | 5,2148258   | -74,0029328  | 3675      | Páramos de Neusa                    | Cundinamarca        | Colombia  |
| Sub2    | A.P00869       | 5,9812498   | -73,0893482  | 3800      | Páramo de la Rusia                  | Boyacá              | Colombia  |
| Sub2    | A.P00881       | 2,848931524 | -76,12471282 | 3780      | Páramo de Sumapaz                   | Meta                | Colombia  |

| Cluster | VegPáramo plot | Latitude    | Longitude    | Elevation | Locality                       | Province/Department | Country   |
|---------|----------------|-------------|--------------|-----------|--------------------------------|---------------------|-----------|
| Sub2    | A.P01045       | 8,815256136 | -70,86418281 | 4400      | Páramo de Piedras Blancas      | Mérida              | Venezuela |
| Sub2    | A.P01261       | -0,4834321  | -78,1118763  | 4600      | Volcán Antisana                | Napo                | Ecuador   |
| Sub2    | A.P01936       | 3,9305143   | -74,1217825  | 3650      | Nevado de Sumapaz              | Cundinamarca        | Colombia  |
| Sub2    | A.P02577       | 0,1310176   | -78,2645637  | 3797      | Laguna de Mojanda              | Imbabura            | Ecuador   |
| Sub2    | A.P02584       | -1,4506604  | -78,4432949  | 3888      | Volcán Tungurahua              | Tungurahua          | Ecuador   |
| Sub2    | A.P02622       | -2,7807109  | -79,2233141  | 3962      | Parque Nacional El Cajas       | Azuay               | Ecuador   |
| Sub2    | A.P02663       | -1,496055   | -78,6228722  | 4042      | Cerro Igualita                 | Tungurahua          | Ecuador   |
| Sub2    | A.P02667       | -1,6409324  | -78,8383093  | 3888      | Vía San Juan-Vinchoa           | Chimborazo          | Ecuador   |
| Sub2    | A.P02677       | -2,30985    | -78,7745317  | 3728      | Páramo parroquia Achupallas    | Chimborazo          | Ecuador   |
| Sub2    | A.P02679       | -3,7122645  | -79,3027001  | 3467      | Páramo carretera Loja-Saraguro | Loja                | Ecuador   |
| Sub2    | A.P02694       | -0,8725041  | -78,910795   | 3753      | Laguna Quilotoa                | Cotopaxi            | Ecuador   |
| Sub2    | A.P02718       | 8,018196    | -71,9707333  | 3225      | Páramo las Rosas               | Táchira             | Venezuela |
| Sup1    | A.P00837       | 3,9395506   | -74,1127663  | 4130      | Páramo de Sumapaz              | Meta                | Colombia  |
| Sup2    | A.P00013       | 6,538351    | -72,3281386  | 4100      | Sierra Nevada del Cocuy        | Boyacá              | Colombia  |
| Sup2    | A.P00416       | 1,2158082   | -77,3498839  | 4250      | Cerro Galeras                  | Nariño              | Colombia  |
| Sup2    | A.P00900       | 4,477039663 | -73,78344923 | 4280      | Sierra Nevada del Cocuy        | Boyacá              | Colombia  |
| Sup2    | A.P02415       | -1,2608753  | -78,4614545  | 4300      | Volcán El Altar                | Chimborazo          | Ecuador   |
| Sup3    | A.P00901       | 6,3666144   | -72,3200042  | 4310      | Sierra Nevada del Cocuy        | Boyaca              | Colombia  |
| Sup3    | A.P02312       | -3,160163   | -79,0338005  | 3200      | Estación de Cumbe              | Azuay               | Ecuador   |
| Sup4    | A.P01298       | -0,6554263  | -78,7133233  | 4600      | Cerro Antisana                 | Napo                | Ecuador   |
