# Supplementary material for: Phytoregionalisation of the Andean páramo
Source: PeerJ journal article supplement (doi:10.7717/peerj.4786), 2018-06-01
Supplement: Peyre-etal_Supplement-S4.pdf [file Peyre-etal_Supplement-S4.pdf]

**Supplemental information SI. 4 to Peyre et al. Phytoregionalisation of the Andean páramo**

| Taxon Name                                                        | Sub-1 | Sub-2 | Mid-1 | Mid-2 | Mid-3 | Mid-4 | Mid-5 | Mid-6 | Mid-7 | Mid-8 | Mid-9 | Sup-1 | Sup-2 | Sup-3 | Sup-4 |
|-------------------------------------------------------------------|-------|-------|-------|-------|-------|-------|-------|-------|-------|-------|-------|-------|-------|-------|-------|
| <i>Pernettya prostrata</i> (Cav.) DC.                             | 81    | 22    | 48    | 45    | 37    | 85    | 70    | 82    | 33    | 55    | 44    | 58    | 8     | 22    | 1     |
| <i>Hypochaeris sessiliflora</i> Kunth                             |       | 3     | 32    | 16    |       | 6     | 30    | 56    |       | 58    | 75    | 67    | 74    | 48    | 65    |
| <i>Calamagrostis effusa</i> (Kunth) Steud.                        | 2     | 1     | 78    | 91    | 73    | 69    | 100   | 3     | 8     | 47    |       | 3     | 1     |       |       |
| <i>Luzula racemosa</i> Desv.                                      |       | 1     | 9     |       | 4     | 4     |       | 3     | 41    | 19    | 40    | 38    | 48    | 62    | 18    |
| <i>Calamagrostis intermedia</i> (J.Presl) Steud.                  |       | 17    | 16    |       |       |       | 5     | 88    |       |       | 65    | 43    |       | 5     | 39    |
| <i>Lycopodium clavatum</i> L.                                     | 92    | 16    | 10    | 43    | 11    | 11    | 50    | 23    | 8     |       | 2     |       |       |       |       |
| <i>Geranium sibbaldioides</i> Benth.                              |       | 8     | 13    | 11    | 7     | 42    | 12    | 47    |       | 48    | 5     | 51    | 8     | 3     |       |
| <i>Oritrophium peruvianum</i> (Lam.) Cuatrec.                     |       | 4     | 3     | 15    | 12    | 11    | 9     | 41    |       | 47    | 2     | 57    | 9     | 35    | 4     |
| <i>Disterigma empetrifolium</i> (Kunth) Drude                     |       | 7     |       | 7     | 31    | 14    | 50    | 50    |       | 11    | 6     | 49    | 4     | 19    |       |
| <i>Bromus lanatus</i> Kunth                                       |       | 1     |       |       | 1     |       |       | 17    | 1     | 41    | 50    | 28    | 58    | 7     | 32    |
| <i>Baccharis caespitosa</i> (Ruiz & Pav.) Pers.                   |       |       |       |       |       |       |       | 10    |       | 16    | 51    | 19    | 25    | 55    | 60    |
| <i>Castilleja fissifolia</i> L.f.                                 | 5     | 8     | 30    | 18    | 7     | 6     | 16    | 11    | 41    | 34    | 17    | 14    | 4     | 14    | 4     |
| <i>Agrostis toluensis</i> Kunth                                   |       | 3     | 22    | 2     |       |       |       | 21    | 31    | 19    | 26    | 10    | 1     | 11    | 68    |
| <i>Xenophyllum humile</i> (Kunth) V.A. Funk                       |       |       |       |       | 3     | 2     |       | 12    |       | 8     | 7     | 89    | 29    | 54    | 1     |
| <i>Eryngium humile</i> Cav.                                       |       | 9     | 2     | 2     | 9     | 7     | 7     | 43    | 10    | 48    | 35    | 19    | 2     | 9     | 1     |
| <i>Hypericum laricifolium</i> Juss.                               |       | 12    | 3     | 1     | 43    | 7     | 54    | 5     | 43    | 22    | 7     |       |       |       |       |
| <i>Oreomyrrhis andicola</i> (Kunth) Hook. f.                      |       | 2     |       |       | 1     |       |       | 15    |       | 44    | 49    | 44    | 23    | 6     | 8     |
| <i>Valeriana microphylla</i> Kunth                                |       | 9     |       |       | 4     |       | 3     | 52    |       | 39    | 52    |       |       | 17    | 13    |
| <i>Gentiana sedifolia</i> Kunth                                   |       |       | 1     | 2     | 4     | 4     |       | 25    |       | 26    | 44    | 45    | 13    | 17    |       |
| <i>Huperzia crassa</i> (Humb. & Bonpl. ex Willd.) Rothm.          |       |       | 1     |       | 3     |       | 7     | 4     |       | 13    | 10    | 54    | 40    | 45    | 3     |
| <i>Blechnum laxense</i> (Kunth) Hook. ex Salomon                  |       | 5     | 2     | 36    | 50    | 26    | 40    | 7     | 1     |       | 5     |       |       | 5     |       |
| <i>Agrostis foliata</i> Hook.f.                                   |       | 1     |       |       |       |       |       | 5     | 1     | 4     | 5     | 47    | 33    | 75    | 6     |
| <i>Rhynchospora macrochaeta</i> Steud. ex Boeck.                  | 42    | 12    | 6     | 57    | 20    | 26    |       | 7     |       |       | 2     |       |       |       |       |
| <i>Nertera granadensis</i> (Mutis ex L.f.) Druce                  | 13    | 10    | 9     | 8     | 27    | 25    | 25    | 11    | 1     | 5     | 7     | 8     |       | 3     |       |
| <i>Cerastium floccosum</i> Benth.                                 |       |       |       |       |       |       |       | 1     |       | 6     | 5     | 9     | 40    | 48    | 42    |
| <i>Arcytophyllum nitidum</i> (Kunth) Schldl.                      | 28    | 8     | 31    | 60    | 3     | 4     |       |       | 10    |       |       | 5     |       |       |       |
| <i>Poa cucullata</i> Hack.                                        |       |       |       |       |       |       |       | 15    |       |       | 29    | 36    |       | 52    | 16    |
| <i>Valeriana pilosa</i> Ruiz & Pav.                               |       | 5     | 10    | 2     | 6     | 9     |       |       |       | 30    | 1     | 29    | 45    | 8     |       |
| <i>Halenia weddelliana</i> Gilg                                   |       | 3     |       |       | 2     |       | 40    | 34    |       |       | 36    | 27    |       | 1     |       |
| <i>Carex pichinchensis</i> Kunth                                  |       |       | 5     | 5     | 12    | 30    | 29    | 16    |       | 22    | 6     | 16    |       |       |       |
| <i>Azorella aretioides</i> (Kunth) Willd. ex DC.                  |       |       |       |       | 3     |       | 5     | 17    |       | 5     | 19    | 65    |       | 23    | 4     |
| <i>Pentacalia vaccinioides</i> (Kunth) Cuatrec.                   |       |       | 10    | 5     | 53    | 18    | 45    | 1     |       | 8     |       |       |       |       |       |
| <i>Hypericum juniperinum</i> Kunth                                | 28    | 3     | 15    | 45    | 13    | 30    |       |       | 5     |       |       |       |       |       |       |
| <i>Vaccinium floribundum</i> Kunth                                |       | 18    | 10    | 32    | 21    | 9     | 23    | 9     | 6     | 5     | 3     |       | 2     |       |       |
| <i>Bidens triplinervia</i> Kunth                                  |       | 8     | 15    |       |       | 2     | 7     | 28    | 20    | 1     | 33    |       |       |       | 21    |
| <i>Paspalum bonplandianum</i> Flüggé                              |       | 9     | 10    | 10    |       | 4     | 25    | 58    | 4     |       | 13    |       |       | 1     |       |
| <i>Chusquea tessellata</i> Munro                                  | 5     | 3     | 10    | 42    | 35    | 34    |       |       |       | 1     |       |       | 1     |       |       |
| <i>Lachemilla orbiculata</i> (Ruiz & Pav.) Rydb.                  |       | 7     |       |       | 4     | 3     |       | 25    |       | 19    | 59    | 8     | 1     |       |       |
| <i>Oreobolus goeppingeri</i> Suss.                                |       | 1     |       | 14    |       |       | 76    | 30    |       |       |       | 4     |       |       |       |
| <i>Azorella pedunculata</i> (Spreng.) Mathias & Constance         |       | 2     |       |       |       |       |       | 13    |       |       | 72    | 3     |       | 34    |       |
| <i>Hieracium avilae</i> Kunth                                     | 7     | 3     | 26    | 10    | 15    | 6     | 7     |       | 9     | 37    |       |       | 3     |       |       |
| <i>Galium hypocarpium</i> (L.) Endl. ex Griseb.                   | 2     | 18    | 12    | 5     | 6     | 6     | 3     | 6     | 43    | 11    | 10    |       |       |       | 1     |
| <i>Lachemilla hispidula</i> (L. M. Perry) Rothm.                  |       | 1     | 5     |       | 3     | 6     |       | 4     |       | 1     | 3     | 58    | 1     | 39    |       |
| <i>Jamesonia imbricata</i> (Sw.) Hook. & Grey.                    | 34    | 1     | 1     | 19    | 9     | 8     | 43    |       | 2     |       |       |       |       |       |       |
| <i>Gnaphalium antennarioides</i> DC.                              |       | 1     | 21    |       | 1     | 1     | 3     |       | 6     | 61    | 3     | 1     | 17    |       |       |
| <i>Melpomene moniliformis</i> (Lag. ex Sw.) A.R. Sm. & R.C. Moran | 7     | 8     | 6     | 8     | 7     | 8     |       |       | 5     | 6     | 1     | 6     | 16    | 35    |       |
| <i>Carex pygmaea</i> Boeck.                                       |       | 1     | 20    | 10    | 6     | 13    | 3     | 32    |       | 5     | 17    | 2     | 3     |       |       |
| <i>Arcytophyllum muticum</i> (Wedd.) Standl.                      |       |       | 5     | 26    | 4     | 65    |       | 6     | 1     | 2     |       |       | 2     |       |       |
| <i>Lupinus microphyllus</i> Desr.                                 |       |       |       |       | 1     |       | 1     | 2     |       | 37    | 31    | 6     | 7     | 6     | 19    |
| <i>Rumex acetosella</i> L.                                        |       | 1     | 5     |       | 3     | 4     |       | 5     | 42    | 26    | 19    |       | 4     |       |       |
| <i>Sisyrinchium jamesonii</i> Baker                               |       |       |       | 12    | 13    | 4     | 23    | 28    | 8     |       | 6     | 12    |       | 2     |       |
| <i>Espeletia pycnophylla</i> Cuatrec.                             |       |       |       |       | 1     |       | 100   | 6     |       |       | 1     |       |       |       |       |
| <i>Lasiocephalus ovatus</i> Schldl.                               |       |       |       |       |       |       | 5     | 3     |       |       | 21    | 21    |       | 34    | 24    |
| <i>Cortaderia hapalotricha</i> (Pilg.) Conert                     | 89    | 1     |       |       |       |       |       |       | 16    |       |       |       |       |       |       |
| <i>Calamagrostis bogotensis</i> (Pilg.) Pilg.                     |       | 4     | 3     | 51    | 6     | 14    | 7     | 8     | 8     |       | 1     | 1     |       | 1     |       |
| <i>Lachemilla nivalis</i> (Kunth) Rothm.                          |       | 2     | 1     | 2     | 2     | 11    | 7     | 7     |       | 15    |       | 25    | 25    | 7     |       |
| <i>Senecio nivalis</i> (Kunth) Cuatrec.                           |       |       |       |       |       |       |       |       |       |       | 3     | 3     |       | 69    | 29    |
| <i>Erigeron ecuadoriensis</i> Hieron.                             |       |       |       |       |       |       |       |       |       |       | 24    | 27    |       | 51    | 1     |
| <i>Senecio formosus</i> Kunth                                     |       | 2     |       | 9     | 3     | 7     |       |       | 41    | 37    |       |       | 3     |       |       |
| <i>Chuquiraga jussieui</i> J.F. Gmel.                             |       | 2     |       |       |       |       |       | 1     |       |       | 29    | 4     |       |       | 63    |
| <i>Calamagrostis recta</i> (Kunth) Trin. ex Steud.                |       |       | 5     |       |       |       |       |       |       | 72    | 1     | 3     | 16    |       |       |
| <i>Senecio canescens</i> (Bonpl.) Cuatrec.                        |       |       |       |       | 1     |       |       | 1     |       |       | 3     | 3     | 37    | 34    | 18    |
| <i>Hesperomeles obtusifolia</i> (Pers.) Lindl.                    | 25    | 24    | 2     | 2     | 9     | 2     | 1     |       | 27    |       | 4     |       |       |       |       |
| <i>Clinopodium nubigenum</i> (Kunth) Kuntze                       |       |       | 3     |       | 2     |       |       | 18    | 1     | 38    | 15    | 11    |       | 5     | 1     |
| <i>Plantago rigida</i> Kunth                                      |       |       |       |       |       |       | 1     |       |       | 18    | 17    | 52    | 3     | 3     |       |
| <i>Acaena cylindristachya</i> Ruiz & Pav.                         |       | 2     | 45    | 1     |       |       | 3     |       |       | 42    |       |       |       |       |       |
| <i>Orthrosanthus chimboracensis</i> (Kunth) Baker                 |       | 13    | 29    | 1     | 1     | 6     | 7     | 21    | 11    |       | 3     |       |       |       |       |

|                                                             |    |    |    |    |    |    |    |    |    |    |    |    |    |    |       |
|-------------------------------------------------------------|----|----|----|----|----|----|----|----|----|----|----|----|----|----|-------|
| Espeletia hartwegiana Sch. Bip.                             |    |    |    |    | 29 | 1  |    |    |    |    | 56 |    |    |    | 3     |
| Hypericum lancioides Cuatrec.                               |    |    |    |    | 2  | 7  | 8  | 9  | 1  | 4  | 34 | 2  | 10 | 11 |       |
| Loricaria thuyoides (Lam.) Sch. Bip.                        | 1  |    |    |    |    | 5  |    | 29 | 2  |    |    | 9  | 29 |    | 8 3   |
| Werneria nubigena Kunth                                     | 1  |    |    |    |    |    |    |    | 7  |    |    | 50 | 1  |    | 1 26  |
| Baccharis tricuneata (L.f.) Pers.                           | 3  | 5  | 9  | 4  | 24 |    |    |    | 2  | 4  | 33 | 1  |    |    |       |
| Niphogeton dissecta (Benth.) J.F.Macbr.                     | 4  | 9  |    | 5  | 1  |    |    |    | 6  | 5  | 12 | 7  | 30 | 4  |       |
| Festuca dolichophylla J. Presl                              | 2  | 7  | 16 | 4  | 19 |    |    |    |    |    | 25 | 4  |    |    | 6     |
| Rhynchospora ruiziana Boeck.                                | 5  |    |    |    | 9  |    |    | 45 | 19 | 4  |    |    |    |    |       |
| Espeletia grandiflora Humb. & Bonpl.                        |    |    |    |    | 56 |    | 21 |    |    |    |    | 1  |    |    |       |
| Bartsia pedicularoides Benth.                               |    |    |    |    |    |    |    |    |    | 3  | 43 | 2  | 6  | 23 |       |
| Chusquea angustifolia (Soderstr. & C.E.Calderón) L.G.Clark  | 73 | 3  |    |    |    |    |    |    |    |    |    |    |    |    |       |
| Erigeron chionophilus Wedd.                                 |    |    |    |    |    |    |    |    |    |    | 27 |    |    |    | 49    |
| Pentacalia vernicosa (Sch. Bip. ex Wedd.) Cuatrec.          |    |    |    |    | 10 | 8  |    |    |    |    | 44 |    |    |    | 12    |
| Puya hamata L.B. Sm.                                        |    |    |    |    |    |    |    | 63 | 10 |    |    | 1  |    |    |       |
| Paepalanthus karstenii Ruhland                              | 2  | 1  | 7  | 32 | 2  | 25 |    |    |    | 3  |    |    |    |    | 1     |
| Pentacalia andicola (Turcz.) Cuatrec.                       | 2  | 2  | 1  | 3  |    |    | 34 | 8  | 5  | 1  | 4  | 12 |    |    |       |
| Elaphoglossum mathewii (Fée) T. Moore                       | 2  | 1  |    |    | 9  |    |    |    | 2  | 3  | 8  | 10 | 6  | 7  | 21 1  |
| Diplostephium rupestre (Kunth) Wedd.                        |    |    |    |    | 9  | 1  |    |    | 1  |    | 4  | 2  | 40 | 6  | 7     |
| Distyigma acuminatum (Kunth) Nied.                          | 52 | 10 |    |    | 6  |    |    |    |    | 1  |    |    |    |    |       |
| Belloa kunthiana (DC.) Anderb. & S.E.Freire                 | 1  |    | 2  |    |    |    |    |    | 5  | 29 | 3  | 12 | 15 | 2  |       |
| Uncinia macrolepis Decne.                                   | 1  |    |    |    | 1  |    |    |    | 7  | 12 | 26 | 21 |    | 1  |       |
| Azorella corymbosa (Ruiz & Pav.) Pers.                      |    |    |    |    |    |    |    |    | 1  | 1  | 2  | 35 | 1  | 28 | 1     |
| Festuca ulochaeta Steud.                                    |    | 3  |    |    |    |    |    |    | 3  |    | 5  | 19 | 3  | 35 |       |
| Carex bonplandii Kunth                                      | 10 | 6  | 1  | 4  | 22 | 18 |    |    |    | 3  | 2  |    |    |    |       |
| Jamesonia goudotii (Hieron.) C. Chr.                        | 1  | 1  |    |    | 6  | 1  | 3  | 5  |    |    | 12 |    | 24 | 7  | 6     |
| Werneria pumila Kunth                                       | 1  |    |    |    |    |    |    |    |    | 1  | 2  | 2  |    | 15 | 45    |
| Eudema nubigena Humb. & Bonpl.                              |    |    |    |    |    |    |    |    |    |    |    |    | 4  |    | 26 34 |
| Polystichum orbiculatum (Desv.) J. Remy & Fée               | 1  | 1  |    |    |    |    | 1  |    |    | 6  | 6  | 7  | 6  | 2  | 27 6  |
| Baccharis genistelloides (Lam.) Pers.                       |    | 13 |    |    | 4  |    |    |    | 15 |    | 9  | 6  |    | 1  | 14    |
| Ruilopezia lopez-palacii (Ruiz-Terán & López-Fig.) Cuatrec. | 60 |    |    |    |    |    |    |    |    |    |    |    |    |    |       |
| Bartsia santolinifolia (Kunth) Benth.                       |    |    | 3  | 35 | 2  | 12 |    |    |    | 1  | 6  |    |    | 1  |       |
| Diplostephium phyllicoides (Kunth) Wedd.                    |    |    | 2  | 57 |    | 1  |    |    |    |    |    |    |    |    |       |
| Senecio rhizocephalus Turcz.                                |    |    |    |    |    |    |    |    | 5  |    | 29 | 4  | 8  | 14 |       |
| Agrostis breviculmis Hitchc.                                | 1  |    |    |    | 1  |    |    |    | 1  | 2  | 9  | 34 | 8  | 3  |       |
| Cortaderia nitida (Kunth) Pilg.                             | 3  |    | 3  | 22 | 5  | 9  |    |    | 2  | 3  |    | 9  | 1  | 1  |       |
| Poa pauciflora Roem. & Schult.                              | 1  |    |    |    | 1  |    |    |    | 21 | 9  | 9  | 5  | 2  |    | 1     |
| Xyris subulata Ruiz & Pav.                                  | 47 |    | 1  | 5  |    | 1  |    |    | 3  |    |    |    |    |    |       |
| Chaetolepis lindeniana (Naudin) Triana                      | 31 | 3  | 3  |    |    |    |    |    |    |    | 20 |    |    |    |       |
| Blechnum schomburgkii (Klotzsch) C. Chr.                    | 44 |    |    |    |    |    |    | 12 |    |    |    |    |    |    |       |
| Ranunculus praemorsus Kunth ex DC.                          | 2  |    |    |    |    |    |    |    | 5  | 1  | 12 | 26 | 7  | 2  | 1     |
| Espeletia schultzii Wedd.                                   | 1  |    |    |    |    |    |    |    |    | 55 |    |    |    |    |       |
| Diplostephium schultzii Wedd.                               |    |    |    |    | 28 |    |    |    |    |    | 25 |    |    | 3  |       |
| Lachemilla galioides (Benth.) Rothm.                        |    |    |    |    | 7  | 1  |    |    |    |    | 40 | 1  | 3  |    |       |
| Diplostephium rhododendroides Hieron.                       |    |    |    |    |    |    |    | 56 |    |    |    |    |    |    |       |
| Bartsia laticrenata Benth.                                  |    |    |    |    |    |    | 1  | 18 |    |    |    |    | 16 | 17 | 4     |
| Calamagrostis fibrovaginata Laegaard                        |    |    |    |    |    |    |    | 6  | 9  |    |    | 25 | 11 | 1  | 4     |
| Galium corymbosum Ruiz & Pav.                               | 6  |    |    |    | 1  |    |    |    | 22 |    |    | 20 |    |    | 6     |
| Astragalus geminiflorus Humb. & Bonpl.                      |    |    |    |    |    |    |    |    |    |    |    | 1  |    |    | 54    |
| Geranium diffusum Kunth                                     | 2  |    |    |    |    |    |    |    | 7  | 24 |    | 21 |    |    |       |
| Luzula gigantea Desv.                                       | 7  | 3  |    |    | 4  | 6  |    |    |    | 2  | 11 | 5  | 8  | 2  | 4     |
| Cerastium subspicatum Wedd.                                 |    |    |    |    | 2  |    |    |    |    |    | 27 |    |    | 23 |       |
| Ctenopteris flabelliformis (Poir.) J. Sm.                   | 2  | 8  |    |    |    |    |    |    |    | 3  |    |    | 17 |    | 21    |
| Sibthorpia repens (L.) Kuntze                               | 10 | 1  |    |    | 6  | 4  |    |    | 16 |    | 1  | 10 | 3  |    |       |
| Geranium stramineum Triana & Planch.                        | 2  |    |    |    | 13 |    |    |    |    | 1  | 4  | 4  | 25 | 1  | 1     |
| Aetheolaena lingulata (Schltdl.) B. Nord.                   |    |    |    |    |    |    |    |    | 8  |    |    | 10 | 13 |    | 2 18  |
| Carex peucophila Holm                                       |    |    |    |    | 5  | 1  |    |    |    |    | 37 |    |    | 7  |       |
| Lachemilla holosericea (L.M. Perry) Rothm.                  |    |    |    |    | 1  |    |    |    |    |    | 22 | 3  | 10 | 12 | 2     |
| Hypericum caracasana Willd.                                 | 28 | 1  | 5  |    |    | 1  |    |    |    |    | 14 |    |    |    |       |
| Sisyrinchium tinctorium Kunth                               | 3  |    |    |    | 2  |    |    |    | 9  | 33 | 1  |    |    |    |       |
| Gentianella corymbosa (Kunth) Weaver & Rödenberg            |    |    |    |    | 8  | 24 | 10 | 4  |    |    | 3  |    |    |    |       |
| Valeriana alypifolia Kunth                                  |    |    |    |    |    |    |    |    |    |    |    |    | 1  |    | 5 42  |
| Monticalia peruviana (Pers.) C. Jeffrey                     | 3  |    |    |    |    |    |    |    | 11 |    |    | 25 | 7  |    | 1     |
| Calamagrostis planifolia (Kunth) Trin. ex Steud.            | 1  |    |    |    | 16 |    |    |    |    | 28 |    | 1  |    |    |       |
| Cotula mexicana (DC.) Cabrera                               | 1  |    |    |    | 6  | 4  |    |    |    |    | 19 | 10 | 7  |    |       |
| Castilleja nubigena Kunth                                   |    |    |    |    |    |    |    |    |    |    |    | 5  | 10 |    | 5 26  |
| Conyza popayanensis (Hieron.) Pruski                        | 1  | 9  |    |    |    |    |    |    |    | 8  | 27 |    |    |    |       |
| Calamagrostis ligulata (Kunth) Hitchc.                      | 1  |    |    |    |    |    |    |    |    |    | 1  |    | 3  | 9  | 31    |
| Polypogon exasperatus (Trin.) Renvoize                      |    |    |    |    | 9  | 2  |    |    |    | 4  | 5  | 16 | 1  | 1  | 7     |
| Lupinus pubescens Benth.                                    |    |    |    |    |    |    |    | 45 |    |    |    |    |    |    |       |
| Hypericum paramitanum N.Robson                              | 44 |    |    |    |    |    |    |    |    |    |    |    |    |    |       |
| Hydrocotyle bonplandii A.Rich.                              |    | 6  |    |    | 3  | 4  | 1  | 9  | 2  |    |    | 19 |    |    |       |

|                                                |    |    |    |    |    |    |    |    |    |    |    |    |    |    |
|------------------------------------------------|----|----|----|----|----|----|----|----|----|----|----|----|----|----|
| Plantago sericea Ruiz & Pav.                   | 2  | 5  |    |    |    |    | 3  | 25 |    |    |    | 9  |    |    |
| Hieracium jubatum Fr.                          | 6  |    |    |    |    | 16 | 2  | 9  | 10 |    |    |    |    |    |
| Brachyotum lindenii Cogn.                      |    |    |    | 5  |    | 38 |    |    |    |    |    |    |    |    |
| Calamagrostis mollis Pilg.                     |    |    |    |    |    |    |    |    | 9  |    |    | 34 |    |    |
| Hypericum decandrum Turcz.                     | 6  |    |    |    |    |    | 36 |    |    |    |    |    |    |    |
| Ophioglossum crotalophoroides Walter           |    |    | 1  | 3  |    |    | 2  | 8  | 3  | 9  | 1  | 15 |    |    |
| Lycopodium magellanicum (P. Beauv.) Sw.        | 1  |    |    | 1  |    |    | 26 | 2  | 1  |    |    | 10 |    |    |
| Castratella piloselloides (Bonpl.) Naudin      |    | 3  | 35 |    | 3  |    |    |    |    |    |    |    |    |    |
| Escallonia myrtilloides L.f.                   | 8  |    |    | 17 | 4  |    |    |    | 11 |    |    |    |    |    |
| Olsynium trinerve (Baker) R.A. Rodr. & Martic. | 1  | 1  |    | 1  | 1  | 9  |    |    | 26 |    | 1  |    |    |    |
| Ranunculus peruvianus Pers.                    |    |    |    | 4  | 2  | 3  | 19 |    | 4  | 5  | 3  |    |    |    |
| Ourisia muscosa Benth.                         |    |    |    |    |    |    |    |    | 2  | 2  | 5  | 4  | 27 |    |
| Geranium stoloniferum Standl.                  | 39 |    |    |    |    |    |    |    |    |    |    |    |    |    |
| Oreobolus venezuelensis Steyerem.              | 15 |    | 14 | 3  | 6  |    |    | 1  |    |    |    |    |    |    |
| Agrostis magellanica Lam.                      | 1  |    |    |    |    |    | 1  |    | 2  |    | 5  | 30 |    |    |
| Agrostis araucana Phil.                        |    | 5  | 2  | 1  |    |    |    |    | 1  |    |    | 30 |    |    |
| Puya santosii Cuatrec.                         |    |    | 26 | 3  | 10 |    |    |    |    |    |    |    |    |    |
| Stevia lucida Lag.                             | 3  | 14 |    |    |    |    |    | 21 |    |    |    |    |    |    |
| Cortaderia sericantha (Steud.) Hitchc.         | 1  | 2  | 4  | 6  |    | 23 |    |    | 1  |    | 1  |    |    |    |
| Azorella crenata (Ruiz & Pav.) Pers.           |    | 5  | 2  | 1  | 1  |    | 5  |    | 23 |    | 1  |    |    |    |
| Geranium multipartitum Benth.                  |    |    |    |    |    |    |    |    |    | 34 |    |    | 4  |    |
| Gaultheria anastomosans (Mutis ex L.f.) Kunth  | 13 | 8  |    | 12 | 3  | 1  |    |    |    |    |    |    |    |    |
| Gaultheria erecta Vent.                        | 2  | 13 | 11 | 5  | 3  |    |    | 2  | 1  |    |    |    |    |    |
| Geranium reptans R. Knuth                      |    | 6  |    |    |    |    |    | 7  |    | 18 | 3  |    | 2  | 1  |
| Aragoa abietina Kunth                          |    |    |    | 29 |    | 8  |    |    |    |    |    |    |    |    |
| Lachemilla mandoniana (Wedd.) Rothm.           |    |    |    | 1  | 5  |    | 2  | 2  | 4  | 7  | 8  | 1  | 7  |    |
| Diplostephium eriophorum Wedd.                 |    |    |    | 1  | 3  |    |    |    | 15 |    |    |    | 18 |    |
| Geranium humboldtii Spreng.                    |    |    |    |    |    |    |    | 16 |    | 16 | 5  |    |    |    |
| Plantago linearis Kunth                        |    |    |    |    |    |    | 14 |    | 1  | 19 |    |    |    | 1  |
| Calandrinia acaulis Kunth                      |    |    |    |    |    |    |    |    | 20 | 5  |    | 7  | 3  |    |
| Myrsine dependens (Ruiz & Pav.) A.Spreng.      | 7  | 11 | 1  |    | 4  | 1  |    | 2  | 8  |    |    |    |    |    |
| Lobelia tenera Kunth                           |    | 5  | 3  | 4  |    | 1  |    | 2  | 18 |    | 1  |    |    |    |
| Festuca procera Kunth                          |    |    | 1  |    | 4  |    |    |    |    | 19 | 3  |    | 7  |    |
| Halenia campanulata Cuatrec.                   |    |    |    |    | 12 |    |    |    |    | 5  |    |    | 17 |    |
| Nototriche jamesonii A.W. Hill                 |    |    |    |    |    |    |    |    |    |    |    |    |    | 34 |
| Gentianella nummularifolia (Griseb.) Fabris    |    |    |    |    |    |    |    | 4  |    | 2  | 21 |    | 6  |    |
| Gentianella dasyantha (Gilg.) Fabris           |    |    |    |    |    |    |    |    | 25 |    |    | 8  |    |    |
| Silene thysanodes Fenzl                        |    |    |    |    |    |    |    |    |    | 13 |    |    | 1  | 19 |
| Loricaria complanata (Sch. Bip.) Wedd.         | 1  | 1  |    | 11 | 1  |    |    | 2  |    |    | 12 | 3  | 1  |    |
| Lachemilla uniflora Maguire                    |    |    | 1  |    |    |    |    | 27 |    | 1  | 3  |    |    |    |
| Gnaphalium pensylvanicum Willd.                |    |    |    |    |    |    |    | 23 |    | 8  |    |    | 1  |    |
| Rhynchospora guaramacalensis M.T.Strong        | 31 |    |    |    |    |    |    |    |    |    |    |    |    |    |
| Daucus montanus Humb. & Bonpl. ex Schult.      | 23 | 1  |    |    |    |    |    |    | 2  |    | 5  |    |    |    |
| Gaiadendron punctatum (Ruiz & Pav.) G.Don      | 6  | 4  | 2  | 9  |    | 10 |    |    |    |    |    |    |    |    |
| Lachemilla vulcanica (Schltdl. & Cham.) Rydb.  | 2  |    |    |    |    |    |    |    |    | 26 | 3  |    |    |    |
| Gaylussacia buxifolia Kunth                    | 1  | 14 | 15 |    | 1  |    |    |    |    |    |    |    |    |    |
| Baccharis prunifolia Kunth                     | 1  | 1  |    | 1  | 1  |    |    |    | 27 |    |    |    |    |    |
| Halenia asclepiadea (Kunth) G. Don             | 1  |    | 20 | 1  | 8  |    |    |    |    |    | 1  |    |    |    |
| Phyllactis rigida (Ruiz & Pav.) Pers.          |    |    | 2  |    |    |    |    | 8  |    | 21 |    |    |    |    |
| Viola bangii Rusby                             |    |    |    |    |    |    |    | 4  |    | 8  | 5  |    | 1  | 13 |
| Gentianella cerastioides (Kunth) Fabris        |    |    |    |    |    |    |    |    |    | 31 |    |    |    |    |
| Orthrosanthus acorifolius (Kunth) Ravenna      | 10 | 1  | 2  |    |    |    |    |    | 17 |    |    |    |    |    |
| Acaena elongata L.                             | 3  | 2  |    | 1  | 2  |    |    |    | 20 | 1  |    | 1  |    |    |
| Lachemilla sprucei (L.M.Perry) Rothm.          | 1  | 1  |    |    |    |    |    |    | 27 | 1  |    |    |    |    |
| Festuca asplundii E.B. Alexeev                 | 1  |    |    |    |    |    |    | 2  |    | 2  | 25 |    |    |    |
| Hieracium sodiroanum Zahn                      |    |    |    |    |    |    |    | 28 |    | 1  |    |    | 1  |    |
| Arenaria dicranoides Kunth                     |    |    |    |    |    |    |    |    |    |    | 1  |    | 15 | 14 |
| Oxalis spiralis Ruiz & Pav. ex G.Don           | 8  |    |    |    |    |    |    |    | 21 |    |    |    |    |    |
| Gunnera magellanica Lam.                       | 4  |    |    |    | 3  |    |    |    |    | 7  | 15 |    |    |    |
| Gnaphalium americanum Mill.                    | 2  |    | 1  | 1  |    |    |    |    |    | 15 | 8  |    | 2  |    |
| Geranium santanderiense R. Knuth               |    |    | 28 |    | 1  |    |    |    |    |    |    |    |    |    |
| Hypochaeris echeagarayi Hieron.                |    |    |    |    |    |    |    |    | 29 |    |    |    |    |    |
| Poa subspicata (J.Presl) Kunth                 |    |    |    |    |    |    |    |    |    | 11 | 7  |    | 3  | 8  |
| Draba depressa Hook. f.                        |    |    |    |    |    |    |    |    |    |    |    |    | 2  | 27 |
| Jamesonia bogotensis H. Karst.                 | 3  | 1  | 18 | 3  | 3  |    |    |    |    |    |    |    |    |    |
| Diplostephium floribundum (Benth.) Wedd.       | 1  |    |    | 10 | 1  | 16 |    |    |    |    |    |    |    |    |
| Muehlenbeckia volcanica (Benth.) Endl.         | 1  |    |    |    |    |    |    |    | 2  | 6  | 9  |    | 2  | 8  |
| Gnaphalium dombeyanum DC.                      |    |    | 6  |    |    |    |    | 1  | 17 | 4  |    |    |    |    |
| Hinterhubera imbricata Cuatrec. & Aristeg.     |    |    | 1  |    |    |    |    |    | 27 |    |    |    |    |    |
| Lupinus prostratus J. Agardh                   |    |    |    |    |    |    |    | 28 |    |    |    |    |    |    |
| Perezia pungens Less.                          |    |    |    |    |    |    |    | 1  |    | 4  |    |    | 1  | 22 |





|                                                      |    |    |    |    |    |   |   |    |   |    |   |    |
|------------------------------------------------------|----|----|----|----|----|---|---|----|---|----|---|----|
| Calamagrostis aurea (Munro ex Wedd.) Hack. ex Sodiro |    |    |    |    |    |   |   |    |   | 2  | 8 | 4  |
| Gaultheria reticulata Kunth                          | 11 |    |    |    |    |   |   |    | 2 |    |   |    |
| Aegopogon cenchroides Humb. & Bonpl. ex Willd.       | 5  |    |    |    |    |   |   |    |   | 8  |   |    |
| Hesperomeles ferruginea (Pers.) Benth.               | 4  |    |    | 4  |    |   |   | 1  | 4 |    |   |    |
| Rhynchospora aristata Boeck.                         | 2  | 5  |    | 6  |    |   |   |    |   |    |   |    |
| Briza monandra (Hack.) Pilg.                         | 2  |    |    |    |    |   |   | 8  |   | 3  |   |    |
| Cerastium mollissimum Poir.                          | 2  |    |    |    |    |   |   | 2  |   | 9  |   |    |
| Espeletia perijaensis Cuatrec.                       |    | 13 |    |    |    |   |   |    |   |    |   |    |
| Hypericum stenopetalum Turcz.                        |    | 13 |    |    |    |   |   |    |   |    |   |    |
| Pentacalia abietina (Willd. ex Wedd.) Cuatrec.       |    |    | 9  |    | 4  |   |   |    |   |    |   |    |
| Lachemilla pectinata (Kunth) Rothm.                  |    |    |    | 12 |    |   |   |    |   | 1  |   |    |
| Miconia pernettifolia Triana                         |    |    |    |    |    |   |   | 13 |   |    |   |    |
| Viola dombeyana DC.                                  |    |    |    |    |    |   |   | 12 |   | 1  |   |    |
| Festuca chimborazensis E.B. Alexeev                  |    |    |    |    |    |   |   | 3  |   | 6  | 4 |    |
| Carex amicta Boott                                   |    |    |    |    |    |   |   |    |   | 13 |   |    |
| Conyza filaginoides (DC.) Hieron.                    |    |    |    |    |    |   |   |    |   | 13 |   |    |
| Gnaphalium meridanum Aristeg.                        |    |    |    |    |    |   |   |    |   | 13 |   |    |
| Grammitis youngii Stolze                             |    |    |    |    |    |   |   |    |   |    | 7 | 6  |
| Ageratina theaeifolia (Benth.) R.M.King & H.Rob.     | 7  | 1  | 3  |    |    |   |   |    | 1 |    |   |    |
| Monnina salicifolia Ruiz & Pav.                      | 4  |    |    |    | 8  |   |   |    |   |    |   |    |
| Ageratina gracilis (Kunth) R.M.King & H.Rob.         | 2  | 4  | 5  |    | 1  |   |   |    |   |    |   |    |
| Lachemilla jamesonii (L.M. Perry) Rothm.             | 1  |    |    |    |    |   |   | 2  |   | 9  |   |    |
| Jamesonia canescens Kunze                            |    |    | 3  |    | 1  |   |   |    | 8 |    |   |    |
| Rhynchospora hieronymi Boeck.                        |    |    |    |    |    |   |   | 12 |   |    |   |    |
| Cotula australis (Sieber ex Spreng.) Hook. f.        |    |    |    |    |    |   |   | 5  |   | 7  |   |    |
| Mona meridensis (Friedrich) Ö.Nilsson                |    |    |    |    |    |   |   |    | 4 | 5  |   | 3  |
| Plagiocheilus peduncularis (Kunth) Wedd.             |    |    |    |    |    |   |   |    |   | 7  | 5 |    |
| Lupinus rupestris Kunth                              |    |    |    |    |    |   |   |    |   |    |   | 12 |
| Diplostegium obtusum S.F.Blake                       | 10 | 1  |    |    |    |   |   |    |   |    |   |    |
| Ruilopezia jaboricensis (Cuatrec.) Cuatrec.          | 10 | 1  |    |    |    |   |   |    |   |    |   |    |
| Muehlenbeckia tamnifolia (Kunth) Meisn.              | 2  | 7  |    | 1  |    |   |   |    |   | 1  |   |    |
| Hymenophyllum myriocarpum Hook.                      | 2  | 7  |    |    | 2  |   |   |    |   |    |   |    |
| Gaultheria glomerata (Cav.) Sleumer                  | 2  | 5  | 1  |    |    | 1 |   | 2  |   |    |   |    |
| Weinmannia fagaroides Kunth                          | 11 |    |    |    |    |   |   |    |   |    |   |    |
| Clethra fimbriata Kunth                              | 7  |    | 4  |    |    |   |   |    |   |    |   |    |
| Berberis goudotii Triana & Planch.                   | 6  |    | 4  |    | 1  |   |   |    |   |    |   |    |
| Stachys elliptica Kunth                              | 1  |    |    |    | 1  |   | 1 |    |   | 7  |   | 1  |
| Geranium meridense Pittier                           | 1  |    |    |    |    |   |   | 10 |   |    |   |    |
| Niphogeton glaucescens (Kunth) J.F. Macbr.           |    |    | 3  | 4  | 1  | 3 |   |    |   |    |   |    |
| Eleocharis stenocarpa Svenson                        |    |    |    |    | 5  | 6 |   |    |   |    |   |    |
| Diplostegium revolutum S. F. Blake                   |    |    |    |    | 3  | 8 |   |    |   |    |   |    |
| Calamagrostis coarctata Eaton                        |    |    |    | 1  |    |   |   |    | 2 |    |   | 8  |
| Monticalia stuebelii (Hieron.) C. Jeffrey            |    |    |    |    |    |   | 5 | 5  |   |    | 1 |    |
| Jamesonia boliviensis A.F. Tryon                     |    |    |    |    |    |   |   | 11 |   |    |   |    |
| Gentianella foliosa (Kunth) Fabris                   |    |    |    |    |    |   |   | 2  |   | 4  | 5 |    |
| Poa trachyphylla Pilg.                               |    |    |    |    |    |   |   |    |   |    |   | 11 |
| Rhynchospora gollmeri Boeckeler                      | 10 |    |    |    |    |   |   |    |   |    |   |    |
| Ruilopezia paltonioides (Standl.) Cuatrec.           | 7  | 3  |    |    |    |   |   |    |   |    |   |    |
| Rubus acanthophyllos Focke                           | 5  |    |    | 5  |    |   |   |    |   |    |   |    |
| Baccharis nitida (Ruiz & Pav.) Pers.                 | 10 |    |    |    |    |   |   |    |   |    |   |    |
| Brachyotum naudinii Triana                           | 10 |    |    |    |    |   |   |    |   |    |   |    |
| Lycopodium thyoides Humb. & Bonpl. ex Willd.         | 8  |    |    |    | 1  |   |   |    | 1 |    |   |    |
| Peperomia hartwegiana Miq.                           | 7  |    |    |    | 2  |   |   |    |   | 1  |   |    |
| Elaphoglossum engelii (H. Karst.) H. Christ          | 6  |    |    |    |    |   | 1 |    |   |    | 3 |    |
| Triniochloa stipoides (Kunth) Hitchc.                | 4  |    |    |    |    |   |   |    |   | 6  |   |    |
| Vicia andicola Kunth                                 | 3  |    |    |    |    | 1 |   | 1  | 1 |    | 4 |    |
| Hypericum silenoides Juss.                           | 3  |    |    |    |    |   | 7 |    |   |    |   |    |
| Cortaderia bifida Pilg.                              | 2  | 6  |    |    |    |   |   |    | 2 |    |   |    |
| Carex lemmaniana Boott                               | 2  |    |    |    |    |   |   |    | 7 |    | 1 |    |
| Trifolium repens L.                                  | 2  |    |    |    |    |   |   |    | 1 |    | 7 |    |
| Hypericum mexicanum L.f.                             | 1  | 6  | 2  |    | 1  |   |   |    |   |    |   |    |
| Diplostegium rosmarinifolium (Benth.) Wedd.          | 1  | 2  | 1  | 4  | 1  |   |   |    |   |    |   | 1  |
| Ourisia chamaedrifolia Benth.                        | 1  |    |    | 1  |    |   |   |    | 2 |    | 5 | 1  |
| Halenia kalbreyeri Gilg                              | 1  |    |    |    |    |   |   | 3  |   | 6  |   |    |
| Bejaria nana A.C.Sm. & Ewan                          |    |    | 10 |    |    |   |   |    |   |    |   |    |
| Hypericum baccharoides Cuatrec.                      |    |    | 10 |    |    |   |   |    |   |    |   |    |
| Lupinus carrikeri C. P. Sm.                          |    |    | 10 |    |    |   |   |    |   |    |   |    |
| Pernettya hirta (Willd.) Sleumer                     |    |    |    | 10 |    |   |   |    |   |    |   |    |
| Huperzia cruenta (Spring) Rothm.                     |    |    |    | 5  | 3  | 2 |   |    |   |    |   |    |
| Monnina revoluta Kunth                               |    |    |    |    | 10 |   |   |    |   |    |   |    |
| Miconia chionophila Naudin                           |    |    |    |    | 4  |   | 5 |    |   |    | 1 |    |







|                                                       |   |   |   |   |   |   |   |   |   |
|-------------------------------------------------------|---|---|---|---|---|---|---|---|---|
| Bartsia glandulifera Molau                            | 2 |   |   |   | 4 |   |   |   |   |
| Rhynchospora marisculus Lindl. & Nees                 | 1 | 4 |   | 1 |   |   |   |   |   |
| Arenaria muscififormis Triana & Planch.               | 1 |   |   |   |   | 5 |   |   |   |
| Puya goudotiana Mez                                   |   | 3 |   | 3 |   |   |   |   |   |
| Paepalanthus pilosus (Kunth) Kunth                    |   |   |   | 1 |   | 5 |   |   |   |
| Holcus lanatus L.                                     |   |   |   |   | 5 |   |   | 1 |   |
| Brachyotum alpinum Cogn.                              |   |   |   |   | 1 | 5 |   |   |   |
| Ranunculus geranioides Kunth                          |   |   |   | 1 | 1 |   |   | 4 |   |
| Chusquea rigida (L.G.Clark) L.G.Clark                 |   |   |   |   |   | 6 |   |   |   |
| Gentianella hyssopifolia (Kunth) Fabris               |   |   |   |   |   | 6 |   |   |   |
| Uncinia lacustris G.A. Wheeler                        |   |   |   |   |   | 5 |   |   | 1 |
| Uncinia phleoides (Cav.) Mey.                         |   |   |   |   | 2 |   |   | 4 |   |
| Coespeletia timotensis (Cuatrec.) Cuatrec.            |   |   |   |   |   |   | 6 |   |   |
| Espeletia marthae Cuatrec.                            |   |   |   |   |   |   | 6 |   |   |
| Festuca fragilis (Luces) B.Briceño                    |   |   |   |   |   |   | 6 |   |   |
| Hinterhubera laseguei Wedd.                           |   |   |   |   |   |   | 6 |   |   |
| Oenothera epilobiifolia Kunth                         |   |   |   |   |   |   | 6 |   |   |
| Trisetum foliosum Swallen                             |   |   |   |   |   |   | 6 |   |   |
| Belloa piptolepis (Wedd.) Cabrera                     |   |   |   |   |   |   | 3 |   | 3 |
| Gamochaeta humilis Wedd.                              |   |   |   |   |   |   |   | 6 |   |
| Cerastium candicans Wedd.                             |   |   |   |   |   |   |   | 5 | 1 |
| Cerastium trianae Briq.                               |   |   |   |   |   |   |   | 5 | 1 |
| Calceolaria rosmarinifolia Lam.                       |   |   |   |   |   |   |   | 3 | 3 |
| Calceolaria ferruginea Cav.                           |   |   |   |   |   |   |   | 3 | 3 |
| Aa argyrolepis Rchb. f.                               |   |   |   |   |   |   |   | 1 | 5 |
| Isoetes novo-granadensis H.P. Fuchs                   |   |   |   |   |   |   |   |   | 6 |
| Elaphoglossum ovatum (Hook. & Grey.) T. Moore         |   |   |   |   |   |   |   |   | 5 |
| Lachemilla rupestris (Kunth) Rothm.                   |   |   |   |   |   |   |   |   | 5 |
| Eriosorus flexuosus (Kunth) Copel.                    | 2 | 2 |   |   | 1 |   |   |   |   |
| Aetanthus colombianus A.C.Sm.                         |   |   |   |   |   |   |   |   | 5 |
| Ageratina fastigiata (Kunth) R.M.King & H.Rob.        |   |   |   |   |   |   |   |   | 5 |
| Arcytophyllum rivetii Danguy & Cherm.                 |   |   |   |   |   |   |   |   | 5 |
| Blechnum lima Rosenst.                                |   |   |   |   |   |   |   |   | 5 |
| Calceolaria rotundifolia Kunth                        |   |   |   |   |   |   |   |   | 5 |
| Chrysactinium caulescens (Hieron.) H. Rob. & Brettell |   |   |   |   |   |   |   |   | 5 |
| Coreopsis oblanceolata S. F. Blake                    |   |   |   |   |   |   |   |   | 5 |
| Miconia bullata (Turcz.) Triana                       |   |   |   |   |   |   |   |   | 5 |
| Schizachyrium sanguineum (Retz.) Alston               |   |   |   |   |   |   |   |   | 5 |
| Stevia macbridei B. L. Rob.                           |   |   |   |   |   |   |   |   | 5 |
| Sticherus revolutus (Kunth) Ching                     |   |   |   |   |   |   |   |   | 5 |
| Geranium ayavacense Willd. ex Kunth                   | 4 | 1 |   |   |   |   |   |   |   |
| Miconia elaeoides Naudin                              | 4 | 1 |   |   |   |   |   |   |   |
| Bomarea brachysepala Benth.                           | 4 |   |   |   |   |   |   | 1 |   |
| Miconia jahnii Pittier                                | 3 |   |   | 2 |   |   |   |   |   |
| Dicksonia sellowiana Hook.                            | 3 |   |   |   |   |   |   | 2 |   |
| Lupinus ramosissimus Benth.                           | 3 |   |   |   |   |   |   | 2 |   |
| Oxalis medicaginea Kunth                              | 3 |   |   |   |   |   |   |   | 2 |
| Lourteigia humilis (Benth.) R. M. King & H. Rob.      | 2 | 1 | 2 |   |   |   |   |   |   |
| Symplocos theiformis (L. f.) Oken                     | 2 |   | 3 |   |   |   |   |   |   |
| Greigia mulfordii L.B. Sm.                            | 2 |   | 2 |   | 1 |   |   |   |   |
| Hypochaeris radicata L.                               | 2 |   | 1 |   |   |   |   |   | 2 |
| Lupinus expependus C.P. Sm.                           | 2 |   |   | 3 |   |   |   |   |   |
| Brachyotum ledifolium (Desr.) Triana                  | 2 |   |   |   |   |   | 2 |   | 1 |
| Baccharis latifolia (Ruiz & Pav.) Pers.               | 2 |   |   |   |   |   |   | 3 |   |
| Bulbostylis tenuifolia (Rudge) J.F.Macbr.             | 1 | 4 |   |   |   |   |   |   |   |
| Geranium holosericeum Willd. ex Spreng.               | 1 | 4 |   |   |   |   |   |   |   |
| Jamesonia rotundifolia Fée                            | 1 |   |   | 2 |   |   | 2 |   |   |
| Cerastium arvense L.                                  | 1 |   |   | 1 | 3 |   |   |   |   |
| Hesperomeles pernettyoides Wedd.                      | 1 |   |   | 1 |   |   |   | 2 | 1 |
| Hieracium peruanum E. M. Fries                        | 1 |   |   |   |   |   |   | 4 |   |
| Chaetolepis perijensis Wurdack                        |   | 5 |   |   |   |   |   |   |   |
| Erigeron raphaelis Cuatrec.                           |   | 5 |   |   |   |   |   |   |   |
| Jamesonia cuatrecasasii A. F. Tryon                   |   | 5 |   |   |   |   |   |   |   |
| Lachemilla purdiei (L.M. Perry) Rothm.                |   | 5 |   |   |   |   |   |   |   |
| Pterichis galeata Lindl.                              |   | 5 |   |   |   |   |   |   |   |
| Senecio leucanthemoides Cuatrec.                      |   | 4 |   |   | 1 |   |   |   |   |
| Stenorrhynchos vaginatum (Kunth) Spreng.              | 3 | 2 |   |   |   |   |   |   |   |
| Hypericum phellos Gleason                             | 3 | 1 | 1 |   |   |   |   |   |   |
| Espeletiopsis colombiana (Cuatrec.) Cuatrec.          | 3 |   |   |   | 2 |   |   |   |   |
| Puya trianae Baker                                    | 1 | 4 |   |   |   |   |   |   |   |
| Castilleja integrifolia L. f.                         |   | 5 |   |   |   |   |   |   |   |

|                                                            |   |   |   |   |   |   |   |   |   |
|------------------------------------------------------------|---|---|---|---|---|---|---|---|---|
| Rhynchospora macrostachya Torr. ex A. Gray                 | 5 |   |   |   |   |   |   |   |   |
| Gynoxys sancti-antonii Cuatrec.                            | 3 |   | 1 | 1 |   |   |   |   |   |
| Lupinus humifusus Sessé & Moc. ex G. Don                   | 3 |   |   |   |   |   |   | 2 |   |
| Lupinus colombiensis C. P. Sm.                             | 2 |   |   |   |   |   |   | 3 |   |
| Gynoxys parvifolia Cuatrec.                                | 1 |   | 3 | 1 |   |   |   |   |   |
| Hypericum thuyoides Kunth                                  |   | 5 |   |   |   |   |   |   |   |
| Niphogeton chiripoi (Suess.) Mathias & Constance           |   | 5 |   |   |   |   |   |   |   |
| Espeletia lopezii Cuatrec.                                 |   | 4 |   |   |   |   |   |   | 1 |
| Paepalanthus mucosus Körn.                                 |   |   | 5 |   |   |   |   |   |   |
| Halenia minima C.K. Allen                                  |   |   |   | 5 |   |   |   |   |   |
| Halenia taruga-gasso Gilg                                  |   |   |   | 5 |   |   |   |   |   |
| Ottoa oenanthoides Kunth                                   |   |   |   | 5 |   |   |   |   |   |
| Puya nutans L.B. Sm.                                       |   |   |   | 5 |   |   |   |   |   |
| Uncinia ecuadorensis G.A. Wheeler & Goetgh.                |   |   |   | 5 |   |   |   |   |   |
| Altensteinia fimbriata Kunth                               |   |   |   | 3 |   |   |   |   | 2 |
| Berroa gnaphalioides (Less.) Beauverd                      |   |   |   | 2 |   |   | 3 |   |   |
| Muhlenbergia ligularis (Hack.) Hitchc.                     |   |   |   | 2 |   |   | 3 |   |   |
| Thelypteris caucaensis (Hieron.) Alston                    |   |   |   | 2 |   |   | 3 |   |   |
| Gentianella hirculus (Griseb.) Fabris                      |   |   |   | 2 |   |   |   |   | 3 |
| Espeletia jajoensis Cuatrec.                               |   |   |   |   |   | 5 |   |   |   |
| Gnaphalium meridanum Aristeg.                              |   |   |   |   |   | 5 |   |   |   |
| Lachemilla ramosissima (Rothm.) Rothm.                     |   |   |   |   |   | 5 |   |   |   |
| Lepechinia bullata (Kunth) 004942                          |   |   |   |   |   | 5 |   |   |   |
| Lupinus meridanus C.P.Sm.                                  |   |   |   |   |   | 5 |   |   |   |
| Pentacalia apiculata (Sch.Bip. ex Wedd.) Cuatrec.          |   |   |   |   |   | 5 |   |   |   |
| Draba rositae Santana & Rangel                             |   |   |   |   |   |   | 2 |   | 3 |
| Taraxacum officinale F.H. Wigg.                            |   |   |   |   |   |   |   | 5 |   |
| Gynoxys acostae Cuatrec.                                   |   |   |   |   |   |   |   | 3 | 2 |
| Calceolaria gossypina Benth.                               |   |   |   |   |   |   |   | 2 |   |
| Carex collumanthus (Steyerf.) L.E.Mora                     |   |   |   |   |   |   |   |   | 4 |
| Spherospermum buxifolium Poepp. & Endl.                    | 2 | 2 |   |   |   |   |   |   |   |
| Themistoclesia dependens (Benth.) A.C.Sm.                  | 2 | 1 |   | 1 |   |   |   |   |   |
| Bomarea setacea (Ruiz & Pav.) Herb.                        |   |   |   |   |   |   |   |   | 4 |
| Calceolaria nivalis Kunth                                  |   |   |   |   |   |   |   |   | 4 |
| Diplostephium ochraceum (Kunth) Nees                       |   |   |   |   |   |   |   |   | 4 |
| Disterigma pentandrum S.F. Blake                           |   |   |   |   |   |   |   |   | 4 |
| Fuchsia petiolaris Kunth                                   |   |   |   |   |   |   |   |   | 4 |
| Geonoma undata Klotzsch                                    |   |   |   |   |   |   |   |   | 4 |
| Miconia aspergillar (Bonpl.) Naudin                        |   |   |   |   |   |   |   |   | 4 |
| Neonelsonia acuminata (Benth.) J.M. Coult. & Rose ex Drude |   |   |   |   |   |   |   |   | 4 |
| Paranephelium uniflorum Poepp. & Endl.                     |   |   |   |   |   |   |   |   | 4 |
| Thibaudia grantii A. C. Sm.                                |   |   |   |   |   |   |   |   | 4 |
| Vaccinium crenatum (G. Don) Sleumer                        |   |   |   |   |   |   |   |   | 4 |
| Weinmannia elliptica Kunth                                 |   |   |   |   |   |   |   |   | 4 |
| Oxalis integra R. Knuth.                                   |   |   |   | 3 |   |   |   |   | 1 |
| Bomarea uncifolia Herb.                                    |   |   |   | 3 |   |   |   |   | 1 |
| Brachyotum andreanum Cogn.                                 |   |   |   | 3 |   |   |   |   | 1 |
| Brachyotum confertum (Bonpl.) Triana                       |   |   |   | 3 |   |   |   |   | 1 |
| Monticalia pulchella (Kunth) C. Jeffrey                    |   |   |   | 2 |   | 2 |   |   |   |
| Miconia puracensis Wurdack                                 |   |   |   | 2 |   |   |   |   | 2 |
| Arracacia xanthorrhiza Bancr.                              |   |   |   | 2 |   |   |   |   | 2 |
| Brachyotum benthamianum Triana                             |   |   |   | 2 |   |   |   |   | 2 |
| Lophosoria quadripinnata (J. F. Gmel.) C. Chr.             |   |   |   | 1 |   | 3 |   |   |   |
| Rubus nubigenus Kunth                                      |   |   |   | 1 |   | 3 |   |   |   |
| Weinmannia mariquitae Szyszyl.                             |   |   |   | 1 |   | 3 |   |   |   |
| Calceolaria microbefaria Kraenzl.                          |   |   |   | 1 |   | 1 |   | 2 |   |
| Sisyrinchium micranthum Cav.                               |   |   |   | 1 |   |   | 3 |   |   |
| Gaultheria buxifolia Willd.                                |   |   |   | 1 |   |   |   | 3 |   |
| Paspalum prostratum Scribn. & Merr.                        |   |   |   | 1 |   |   |   | 3 |   |
| Plantago australis Lam.                                    |   |   |   | 1 |   |   | 1 |   | 2 |
| Gentianella rapunculoides (Willd. ex Schult.) J.S. Pringle |   |   |   | 1 |   |   |   |   | 3 |
| Gynoxys hallii Hieron.                                     |   |   |   | 1 |   |   |   |   | 3 |
| Monnina phillyreoides (Bonpl.) B. Eriksen                  |   |   |   | 1 |   |   |   |   | 3 |
| Gaultheria amoena A.C. Sm.                                 |   |   |   | 1 |   |   |   | 1 | 2 |
| Pentacalia teretifolia (Kunth) Cuatrec.                    |   |   |   | 1 |   |   |   |   |   |
| Carex sanctae-marthae L.E.Mora & J.O.Rangel                |   |   |   |   | 4 |   |   |   |   |
| Coespeletia thyrsiformis (A.C.Sm.) Cuatrec.                |   |   |   |   | 4 |   |   |   |   |
| Diplostephium anactinotum Wedd.                            |   |   |   |   | 4 |   |   |   |   |
| Obtegeria caerulea (Benth.) Doroszenko & P.D.Cantino       |   |   |   |   | 4 |   |   |   |   |
| Oligandra chrysocoma Wedd.                                 |   |   |   |   | 4 |   |   |   |   |
| Perissocoeleum purdiei Mathias & Constance                 |   |   |   |   | 4 |   |   |   |   |

|                                                    |   |   |   |   |   |   |   |   |   |
|----------------------------------------------------|---|---|---|---|---|---|---|---|---|
| Echeveria bicolor (Kunth) Walth.                   | 1 |   |   |   | 3 |   |   |   |   |
| Laestadia pinifolia Kunth ex Less.                 |   | 3 |   | 1 |   |   |   |   |   |
| Diplostegium spinulosum Wedd.                      |   |   | 4 |   |   |   |   |   |   |
| Hypericum ruscoides Cuatrec.                       |   |   | 4 |   |   |   |   |   |   |
| Ilex laureola Triana                               |   |   | 4 |   |   |   |   |   |   |
| Bromus catharticus Vahl                            |   |   | 3 |   |   | 1 |   |   |   |
| Gynoxys baccharoides (Kunth) Cass.                 |   |   | 2 |   |   |   | 2 |   |   |
| Huperzia rufescens (Hook.) Trevis.                 |   |   | 1 | 1 |   |   |   | 1 | 1 |
| Puya clava-herculis Mez & Sodiro                   |   |   | 1 |   |   | 3 |   |   |   |
| Aragoa occidentalis Pennell                        |   |   |   | 4 |   |   |   |   |   |
| Gnaphalium dysodes Spreng.                         |   |   |   |   | 3 |   |   | 1 |   |
| Hypericum loxense Benth.                           |   |   |   |   |   | 3 |   | 1 |   |
| Sisyrinchium vaginatum Spreng.                     |   |   |   |   |   | 2 | 1 | 1 |   |
| Gynoxys miniphylla Cuatrec.                        |   |   |   |   |   | 2 |   | 2 |   |
| Phlegmariurus hypogaeus (B. Øllg.) B. Øllg.        |   |   |   |   |   | 2 |   | 2 |   |
| Achyrocline ramosissima Britton                    |   |   |   |   |   |   | 4 |   |   |
| Agrostis mertensii Trin.                           |   |   |   |   |   |   | 4 |   |   |
| Aragoa lucidula S.F.Blake                          |   |   |   |   |   |   | 4 |   |   |
| Bulbostylis capillaris (L.) Kunth ex C.B.Clark     |   |   |   |   |   |   | 4 |   |   |
| Elaphoglossum deorsum (H. Karst.) Vareschi         |   |   |   |   |   |   | 4 |   |   |
| Lachemilla equisetiformis (Trev.) Rothm.           |   |   |   |   |   |   | 4 |   |   |
| Pityrogramma chrysoconia (Desv.) Maxon ex Domin    |   |   |   |   |   |   | 4 |   |   |
| Stachys venezuelana Briq.                          |   |   |   |   |   |   | 4 |   |   |
| Valeriana phyllicoides (Turcz.) Briq.              |   |   |   |   |   |   | 4 |   |   |
| Vulpia bromoides (L.) Gray                         |   |   |   |   |   |   | 4 |   |   |
| Draba sericea Santana & Rangel                     |   |   |   |   |   |   |   | 1 | 3 |
| Senecio niveoaurus Cuatrec.                        |   |   |   |   |   |   |   | 1 | 3 |
| Calamagrostis rigida (Kunth) Trin. ex Steud.       |   |   |   |   |   |   |   | 4 |   |
| Calceolaria hyssopifolia Kunth                     |   |   |   |   |   |   |   | 4 |   |
| Gentianella rupicola (Kunth) Holub                 |   |   |   |   |   |   |   | 4 |   |
| Silene andicola Gillies ex Hook. & Arn.            |   |   |   |   |   |   |   | 4 |   |
| Aphanactis ollgaardii H. Rob.                      |   |   |   |   |   |   |   | 2 | 2 |
| Ribes hirtum Willd. ex Roem. & Schult.             |   |   |   |   |   |   |   | 1 | 3 |
| Ranunculus gusmannii Humb. ex Caldas               |   |   |   |   |   |   |   |   | 4 |
| Senecio hypsobates Wedd.                           |   |   |   |   |   |   |   |   | 3 |
| Lasiocephalus gargantuanus (Cuatrec.) Cuatrec.     |   |   |   |   |   |   |   | 1 | 3 |
| Stipa hans-meyeri Pilg.                            |   |   |   |   |   |   |   |   | 4 |
| Ruilopezia jahnii (Standl.) Cuatrec.               | 2 |   |   | 1 |   |   |   |   |   |
| Pentacalia greenmaniana (Hieron.) Cuatrec.         | 2 |   |   |   |   | 1 |   |   |   |
| Alnus acuminata Kunth                              |   | 3 |   |   |   |   |   |   |   |
| Asplenium serra Langsd. & Fisch.                   |   | 3 |   |   |   |   |   |   |   |
| Begonia urticae L.f.                               |   | 3 |   |   |   |   |   |   |   |
| Calceolaria fusca Pennell                          |   | 3 |   |   |   |   |   |   |   |
| Cuphea ciliata Ruiz & Pav.                         |   | 3 |   |   |   |   |   |   |   |
| Epidendrum erosum Ames & C.Schweinf.               |   | 3 |   |   |   |   |   |   |   |
| Epidendrum loxense F. Lehm. & Kraenzl.             |   | 3 |   |   |   |   |   |   |   |
| Eriosorus aureonitens (Hook.) Copel.               |   | 3 |   |   |   |   |   |   |   |
| Eriosorus cheilanthoides (Sw.) A.F. Tryon          |   | 3 |   |   |   |   |   |   |   |
| Gynoxys cuicochensis Cuatrec.                      |   | 3 |   |   |   |   |   |   |   |
| Maxillaria klugii C. Schweinf.                     |   | 3 |   |   |   |   |   |   |   |
| Monochaetum discolor H.Karst. ex Triana            |   | 3 |   |   |   |   |   |   |   |
| Morella parvifolia (Benth.) Parra-O.               |   | 3 |   |   |   |   |   |   |   |
| Oreopanax bogotensis Cuatrec.                      |   | 3 |   |   |   |   |   |   |   |
| Peperomia tequendamana Trel.                       |   | 3 |   |   |   |   |   |   |   |
| Pitcairnia trianae André                           |   | 3 |   |   |   |   |   |   |   |
| Puya lineata Mez                                   |   | 3 |   |   |   |   |   |   |   |
| Sabazia trianae (Hieron.) Longpre                  |   | 3 |   |   |   |   |   |   |   |
| Stelis pusilla Kunth                               |   | 3 |   |   |   |   |   |   |   |
| Stevia andina B.L. Rob.                            |   | 3 |   |   |   |   |   |   |   |
| Tillandsia compacta Griseb.                        |   | 3 |   |   |   |   |   |   |   |
| Tillandsia seemannii (Baker) Mez                   |   | 3 |   |   |   |   |   |   |   |
| Tillandsia tripinnata (Baker) Mez                  |   | 3 |   |   |   |   |   |   |   |
| Tillandsia turneri Baker                           |   | 3 |   |   |   |   |   |   |   |
| Weinmannia cymbifolia Diels                        |   | 3 |   |   |   |   |   |   |   |
| Arcytophyllum capitatum (Benth.) K. Schum.         |   | 2 |   | 1 |   |   |   |   |   |
| Lycopodiella alopecuroides (L.) Cranfill           |   | 2 |   |   | 1 |   |   |   |   |
| Eriosorus rufescens (Fée) A.F. Tryon               |   | 2 |   |   |   | 1 |   |   |   |
| Acaena ovalifolia Ruiz & Pav.                      |   | 2 |   |   |   |   |   | 1 |   |
| Ageratina glechonophylla (Less.) R.M.King & H.Rob. |   | 2 |   |   |   |   |   | 1 |   |
| Berberis lobbiana (C.K. Schneid.) C.K. Schneid.    |   | 2 |   |   |   |   |   | 1 |   |
| Melpomene peruviana (Desv.) A.R. Sm. & R.C. Moran  | 1 | 2 |   |   |   |   |   |   |   |



|                                                                       |   |   |   |
|-----------------------------------------------------------------------|---|---|---|
| <i>Festuca guaramacalana</i> Stancik                                  | 2 |   |   |
| <i>Huperzia amentacea</i> (B. Øllg.) Holub                            | 2 |   |   |
| <i>Hymenophyllum trichomanoides</i> Bosch                             | 2 |   |   |
| <i>Ruilopezia viridis</i> (Aristeg.) Cuatrec.                         | 2 |   |   |
| <i>Baccharis phyllicoides</i> Kunth                                   | 2 |   |   |
| <i>Bartsia sericea</i> Molau                                          | 2 |   |   |
| <i>Bartsia tomentosa</i> Molau                                        | 2 |   |   |
| <i>Berberis podophylla</i> C. Schneider                               | 2 |   |   |
| <i>Blechnum divergens</i> (Kunze) Mett.                               | 2 |   |   |
| <i>Bomarea dissitifolia</i> Baker                                     | 2 |   |   |
| <i>Brachyotum microdon</i> (Naudin) Triana                            | 2 |   |   |
| <i>Brachyotum rostratum</i> (Naudin) Triana                           | 2 |   |   |
| <i>Cacosmia rugosa</i> Kunth                                          | 2 |   |   |
| <i>Calceolaria mexicana</i> Benth.                                    | 2 |   |   |
| <i>Calceolaria rhododendroides</i> Kraenzl.                           | 2 |   |   |
| <i>Calceolaria tripartita</i> Ruiz & Pav.                             | 2 |   |   |
| <i>Carex larensis</i> Steyerm.                                        | 2 |   |   |
| <i>Cavendishia bracteata</i> (Ruiz & Pav. ex J.St.-Hil.) Hoerold      | 2 |   |   |
| <i>Ceratostema alatum</i> (Hoerold) Sleumer                           | 2 |   |   |
| <i>Chusquea asymmetrica</i> (L.G.Clark) L.G.Clark                     | 2 |   |   |
| <i>Chusquea leonardiorum</i> L.G. Clark                               | 2 |   |   |
| <i>Chusquea loxensis</i> L.G. Clark                                   | 2 |   |   |
| <i>Clusia ducuoides</i> Engl.                                         | 2 |   |   |
| <i>Culcita conifolia</i> (Hook.) Maxon                                | 2 |   |   |
| <i>Disterigma codonanthum</i> S.F. Blake                              | 2 |   |   |
| <i>Epidendrum cylindraceum</i> Lindl.                                 | 2 |   |   |
| <i>Epidendrum fimbriatum</i> Kunth                                    | 2 |   |   |
| <i>Eriocaulon microcephalum</i> Kunth                                 | 2 |   |   |
| <i>Eriosorus elongatus</i> (Grev. & Hook.) Copel.                     | 2 |   |   |
| <i>Freziera canescens</i> Humb. & Bonpl.                              | 2 |   |   |
| <i>Fuchsia venusta</i> Kunth                                          | 2 |   |   |
| <i>Gaultheria foliolosa</i> Benth.                                    | 2 |   |   |
| <i>Geissanthus vanderwerffii</i> Pipoly                               | 2 |   |   |
| <i>Gentianella liniflora</i> (Kunth) Fabris ex J. Pringle             | 2 |   |   |
| <i>Gynoxys laurifolia</i> (Kunth) Cass.                               | 2 |   |   |
| <i>Hedyosmum racemosum</i> (Ruiz & Pav.) G.Don                        | 2 |   |   |
| <i>Hedyosmum scabrum</i> (Ruiz & Pav.) Solms                          | 2 |   |   |
| <i>Hymenophyllum amabile</i> C. V. Morton                             | 2 |   |   |
| <i>Hymenophyllum dependens</i> C.V. Morton                            | 2 |   |   |
| <i>Ilex myricoides</i> Kunth                                          | 2 |   |   |
| <i>Ilex ovalis</i> (Ruiz & Pav.) Loes.                                | 2 |   |   |
| <i>Libanothamnus parvulus</i> Cuatrec.                                | 2 |   |   |
| <i>Lysimachia andina</i> Sandwith                                     | 2 |   |   |
| <i>Macrocarpaea bracteata</i> Ewan                                    | 2 |   |   |
| <i>Melpomene sodiroi</i> (H. Christ & Rosenst.) A.R. Sm. & R.C. Moran | 2 |   |   |
| <i>Miconia dodsonii</i> Wurdack                                       | 2 |   |   |
| <i>Miconia poortmannii</i> (Cogn.) Wurdack                            | 2 |   |   |
| <i>Munnozia senecionidis</i> Benth.                                   | 2 |   |   |
| <i>Myrsine andina</i> (Mez) Pipoly                                    | 2 |   |   |
| <i>Myrsine coriacea</i> (Sw.) R.Br. ex Roem. & Schult.                | 2 |   |   |
| <i>Myrsine manglilla</i> R.Br.                                        | 2 |   |   |
| <i>Niphidium crassifolium</i> (L.) Lellinger                          | 2 |   |   |
| <i>Ocotea sericea</i> Kunth                                           | 2 |   |   |
| <i>Paepalanthus andicola</i> Körn.                                    | 2 |   |   |
| <i>Psychotria ceciliata</i> Steyerm.                                  | 2 |   |   |
| <i>Roupala monosperma</i> (Ruiz & Pav.) I.M. Johnst.                  | 2 |   |   |
| <i>Rubus coriaceus</i> Poir.                                          | 2 |   |   |
| <i>Rubus gachetensis</i> Berger                                       | 2 |   |   |
| <i>Schefflera acuminata</i> (Pav.) Harms                              | 2 |   |   |
| <i>Senecio usgorensis</i> Cuatrecasas                                 | 2 |   |   |
| <i>Sticherus lechleri</i> (Mett. ex Kuhn) Nakai                       | 2 |   |   |
| <i>Terpsichore alsopeteris</i> (C.V. Morton) A.R. Sm.                 | 2 |   |   |
| <i>Tibouchina laxa</i> (Desr.) Cogn.                                  | 2 |   |   |
| <i>Tillandsia wurdackii</i> L.B. Sm.                                  | 2 |   |   |
| <i>Utricularia unifolia</i> Ruiz & Pav.                               | 2 |   |   |
| <i>Vriesea tequendamae</i> (André) L.B.Sm.                            | 2 |   |   |
| <i>Weinmannia reticulata</i> Ruiz & Pav.                              | 2 |   |   |
| <i>Ruilopezia hanburiana</i> (Cuatrec.) Cuatrec.                      | 1 | 1 |   |
| <i>Carex acutata</i> Boott                                            | 1 |   | 1 |
| <i>Diplostephium empetrifolium</i> S.F. Blake                         | 1 |   | 1 |
| <i>Gynoxys lehmannii</i> Hieron.                                      | 1 |   | 1 |

|                                                    |   |   |   |   |   |   |   |   |   |
|----------------------------------------------------|---|---|---|---|---|---|---|---|---|
| Polypodium monosorum Desv.                         | 1 | 1 |   |   |   |   |   |   |   |
| Juncus bufonius L.                                 | 1 |   | 1 |   |   |   |   |   |   |
| Miconia tinifolia Naudin                           | 1 |   |   | 1 |   |   |   |   |   |
| Calamagrostis rupestris Trin.                      | 1 |   |   |   | 1 |   |   |   |   |
| Gaultheria lanigera Hook.                          | 1 |   |   |   | 1 |   |   |   |   |
| Gaultheria tomentosa Kunth                         | 1 |   |   |   | 1 |   |   |   |   |
| Grammitis paramicola L. E. Bishop                  | 1 |   |   |   | 1 |   |   |   |   |
| Juncus ecuadoriensis Balslev                       | 1 |   |   |   | 1 |   |   |   |   |
| Valeriana convallarioides (Schmale) B.B. Larsen    | 1 |   |   |   | 1 |   |   |   |   |
| Campyloneurum amphostenon (Kunze ex Klotzsch) Fée  | 1 |   |   |   |   | 1 |   |   |   |
| Coriaria ruscifolia L.                             | 1 |   |   |   |   | 1 |   |   |   |
| Dendrophthora meridana Kuijt                       | 1 |   |   |   |   | 1 |   |   |   |
| Diplostegium venezuelense Cuatrec.                 | 1 |   |   |   |   | 1 |   |   |   |
| Drymaria villosa Schldl. & Cham.                   | 1 |   |   |   |   | 1 |   |   |   |
| Elaphoglossum nivosum (Kunze) Mickel               | 1 |   |   |   |   | 1 |   |   |   |
| Elaphoglossum tachirense Mickel                    | 1 |   |   |   |   | 1 |   |   |   |
| Myrcianthes myrsinoides (Kunth) F.T.Grifo          | 1 |   |   |   |   | 1 |   |   |   |
| Poa mucuchachensis Luces                           | 1 |   |   |   |   | 1 |   |   |   |
| Rubus bogotensis Kunth                             | 1 |   |   |   |   | 1 |   |   |   |
| Hydrocotyle gunnerifolia Wedd.                     | 1 |   |   |   |   |   | 1 |   |   |
| Saracha quitensis (Hook.) Miers                    | 1 |   |   |   |   |   | 1 |   |   |
| Aa paleacea (Kunth) Rehb.f.                        | 1 |   |   |   |   |   |   | 1 |   |
| Achyrocline hallii Hieron.                         | 1 |   |   |   |   |   |   | 1 |   |
| Achyrocline trianae Klatt                          | 1 |   |   |   |   |   |   | 1 |   |
| Castilleja virgata (Wedd.) Edwin                   | 1 |   |   |   |   |   |   | 1 |   |
| Galium aparine L.                                  | 1 |   |   |   |   |   |   | 1 |   |
| Gynoxys sodiroi Hieron.                            | 1 |   |   |   |   |   |   | 1 |   |
| Phlegmariurus saururus (Lam.) B. Øllg.             | 1 |   |   |   |   |   |   |   | 1 |
| Berberis glauca Kunth                              | 2 |   |   |   |   |   |   |   |   |
| Conyza proliaba Cuatrec.                           | 2 |   |   |   |   |   |   |   |   |
| Lourteigia microphylla (L. f) R. M. King & H. Rob. | 2 |   |   |   |   |   |   |   |   |
| Puya grantii L.B.Sm.                               | 2 |   |   |   |   |   |   |   |   |
| Xyris columbiana Malme                             | 2 |   |   |   |   |   |   |   |   |
| Asplenium castaneum Schldl. & Cham.                | 1 |   |   |   |   | 1 |   |   |   |
| Oritrophium nevadense (Wedd.) Cuatrec.             | 1 |   |   |   |   | 1 |   |   |   |
| Uncinia hamata (Sw.) Urb.                          | 1 |   |   |   |   |   |   | 1 |   |
| Gynoxys ilicifolia (L.f.) Wedd.                    | 2 |   |   |   |   |   |   |   |   |
| Paepalanthus lodiculoides Moldenke                 | 2 |   |   |   |   |   |   |   |   |
| Phytolacca icosandra L.                            | 2 |   |   |   |   |   |   |   |   |
| Rhynchospora oreoboloidea Gómez-Laur.              | 2 |   |   |   |   |   |   |   |   |
| Sisyrinchium convolutum Nocca                      | 2 |   |   |   |   |   |   |   |   |
| Carex livida (Wahlenb.) Willd.                     | 1 | 1 |   |   |   |   |   |   |   |
| Greigia stenolepis L. B. Sm.                       | 1 |   | 1 |   |   |   |   |   |   |
| Aetheolaena otophora (Wedd.) B. Nord.              | 2 |   |   |   |   |   |   |   |   |
| Aetheolaena patens (Kunth) B. Nord.                | 2 |   |   |   |   |   |   |   |   |
| Geranium rhomboidale H.E. Moore                    | 2 |   |   |   |   |   |   |   |   |
| Jamesonia scammaniae A.F. Tryon                    | 2 |   |   |   |   |   |   |   |   |
| Tibouchina grossa (L.f.) Cogn.                     | 2 |   |   |   |   |   |   |   |   |
| Plagiocheilus solivaeformis DC.                    | 1 |   |   |   |   |   | 1 |   |   |
| Calamagrostis densiflora (J. Presl) Steud.         |   |   |   |   | 2 |   |   |   |   |
| Hypericum prostratum Cuatrec.                      |   |   |   |   | 2 |   |   |   |   |
| Juncus cyperoides Laharpe                          |   |   | 1 | 1 |   |   |   |   |   |
| Cerastium kunthii Briq.                            |   |   | 1 |   |   |   |   | 1 |   |
| Gentianella limoselloides (Kunth) Fabris           |   |   |   | 1 |   |   |   | 1 |   |
| Diplostegium oblanceolatum S.F. Blake              |   |   |   |   |   | 2 |   |   |   |
| Gentianella saxifragoides (Kunth) Fabris           |   |   |   |   |   | 2 |   |   |   |
| Hieracium frigidulans Zahn                         |   |   |   |   |   | 2 |   |   |   |
| Huperzia capellae (Herter) Holub                   |   |   |   |   |   | 2 |   |   |   |
| Huperzia compacta (Hook.) Trevis.                  |   |   |   |   |   | 2 |   |   |   |
| Lupinus revolutus C.P. Sm.                         |   |   |   |   |   | 2 |   |   |   |
| Miconia prietoi Wurdack                            |   |   |   |   |   | 2 |   |   |   |
| Sporobolus lasiophyllus Pilg.                      |   |   |   |   |   | 2 |   |   |   |
| Uncinia paludosa G.A. Wheeler & Goetgh.            |   |   |   |   |   | 1 |   | 1 |   |
| Vicia setifolia Kunth                              |   |   |   |   |   | 1 |   | 1 |   |
| Senecio tephrosioides Turcz.                       |   |   |   |   |   | 1 |   |   | 1 |
| Viola glandularis H.E. Ballard & P. Jorg.          |   |   |   |   |   | 1 |   |   | 1 |
| Asplenium castaneum Schldl. & Cham.                |   |   |   |   |   |   | 2 |   |   |
| Asplenium polyphyllum Bertol.                      |   |   |   |   |   |   | 2 |   |   |
| Calamagrostis meridensis (Luces) Briceño           |   |   |   |   |   |   | 2 |   |   |
| Coespeletia spicata (Sch.Bip. ex Wedd.) Cuatrec.   |   |   |   |   |   |   | 2 |   |   |
| Draba arbuscula Hook.f.                            |   |   |   |   |   |   | 2 |   |   |

|                                                           |   |   |   |   |
|-----------------------------------------------------------|---|---|---|---|
| Drymaria ovata Willd. ex Roem. & Schult.                  | 2 |   |   |   |
| Erigeron paramensis Aristeg. & Cuatrec.                   | 2 |   |   |   |
| Gynoxys meridana Cuatrec.                                 | 2 |   |   |   |
| Hieracium venezuelanum Arvet-Touvet                       | 2 |   |   |   |
| Lupinus peruvianus Ulbr.                                  | 2 |   |   |   |
| Lupinus pygmaeus Tamayo ex Pittier                        | 2 |   |   |   |
| Pentacalia imbricatifolia (Sch.Bip. ex Wedd.) Cuatrec.    | 2 |   |   |   |
| Ruilopezia floccosa (Standl.) Cuatrec.                    | 2 |   |   |   |
| Senecio aristeguietae Cuatrec.                            | 2 |   |   |   |
| Senecio funkii Sch.Bip.                                   | 2 |   |   |   |
| Setaria parviflora (Poir.) Kerguélen                      | 2 |   |   |   |
| Stevia caracasana DC.                                     | 2 |   |   |   |
| Urtica ballotifolia Wedd.                                 | 1 | 1 |   |   |
| Gnaphalium domingense Lam.                                |   | 1 |   | 1 |
| Hymenophyllum karstenianum J. W. Sturm                    |   | 1 |   | 1 |
| Ageratina sodiroi (Hieron.) R.M. King & H. Rob.           |   |   | 2 |   |
| Aristeguietia glutinosa (Lam.) R.M. King & H. Rob.        |   |   | 2 |   |
| Asplenium peruvianum Desv.                                |   |   | 2 |   |
| Bidens rubifolia Kunth                                    |   |   | 2 |   |
| Geranium sericeum Willd. ex Spreng.                       |   |   | 2 |   |
| Nassella brachyphylla (Hitc.) Barkworth                   |   |   | 2 |   |
| Oxalis filiformis Kunth                                   |   |   | 2 |   |
| Sagina apetala Ard.                                       |   |   | 2 |   |
| Sonchus oleraceus L.                                      |   |   | 2 |   |
| Calamagrostis teretifolia Lægaard                         |   |   | 1 | 1 |
| Cuatrecasiella isernii (Cuatrec.) H. Rob.                 |   |   | 1 | 1 |
| Draba pycnophylla Turcz.                                  |   |   | 1 |   |
| Cerastium crassipes Bartl.                                |   |   |   | 2 |
| Draba alyssoides Humb. & Bonpl. ex DC.                    |   |   |   | 2 |
| Draba hammenii Cuatrec. & Cleef                           |   |   |   | 1 |
| Draba extensa Wedd.                                       |   |   |   | 1 |
| Hypolepis obtusata (C. Presl) Hieron.                     |   |   |   | 2 |
| Phlegmariurus tetragonus (Hook. & Grev.) B. Øllg.         |   |   |   | 2 |
| Acalypha diversifolia Jacq.                               | 1 |   |   |   |
| Acalypha macrostachya Jacq.                               | 1 |   |   |   |
| Acalypha padifolia Kunth                                  | 1 |   |   |   |
| Ageratina piurae (B. Rob.) King & H. Rob.                 | 1 |   |   |   |
| Ageratina pseudochilca (Benth.) R.M. King & H. Rob.       | 1 |   |   |   |
| Ageratina scopulorum (Wedd.) R. M. King & H. Rob.         | 1 |   |   |   |
| Agrostis subrepens (Hitc.) Hitc.                          | 1 |   |   |   |
| Alansmia dependens (Baker) Moguel & M. Kessler            | 1 |   |   |   |
| Antennaria linearifolia Wedd.                             | 1 |   |   |   |
| Anthurium oxybelium Schott                                | 1 |   |   |   |
| Antidaphne andina Kuijt                                   | 1 |   |   |   |
| Axinaea macrophylla (Naudin) Triana                       | 1 |   |   |   |
| Axinaea nitida Cogn.                                      | 1 |   |   |   |
| Axonopus fissifolius (Raddi) Kuhl.                        | 1 |   |   |   |
| Baccharis bogotensis Kunth                                | 1 |   |   |   |
| Bartsia trichophylla Wedd.                                | 1 |   |   |   |
| Bartsia weberbaueri Diels                                 | 1 |   |   |   |
| Berberis lutea Ruiz & Pav.                                | 1 |   |   |   |
| Bomarea angulata Benth.                                   | 1 |   |   |   |
| Bomarea nervosa (Herb.) Baker                             | 1 |   |   |   |
| Brachyotum fraternum Wurdack                              | 1 |   |   |   |
| Brachyotum grisebachii Cogn.                              | 1 |   |   |   |
| Brachyotum tyrianthinum J. F. Macbr.                      | 1 |   |   |   |
| Bulbostylis juncooides (Vahl) Kôk. ex Osten               | 1 |   |   |   |
| Cardamine alberti O. E. Schulz                            | 1 |   |   |   |
| Castilleja meridensis Pennell                             | 1 |   |   |   |
| Cavendishia bracteata (Ruiz & Pav. ex J.St.-Hil.) Hoerold | 1 |   |   |   |
| Ceradenia meridensis (Klotzsch) L.E. Bishop               | 1 |   |   |   |
| Ceratostema reginaldii (Sleumer) A.C. Sm.                 | 1 |   |   |   |
| Chusquea neurophylla L.G. Clark                           | 1 |   |   |   |
| Chusquea perligulata (Pilg.) McClure                      | 1 |   |   |   |
| Chusquea scandens Kunth                                   | 1 |   |   |   |
| Cinchona mutisii Lamb.                                    | 1 |   |   |   |
| Clethra cuneata Rusby                                     | 1 |   |   |   |
| Clethra fagifolia Kunth                                   | 1 |   |   |   |
| Clinopodium revolutum (Ruiz & Pav.) Govaerts              | 1 |   |   |   |
| Clinopodium taxifolium (Kunth) Govaerts                   | 1 |   |   |   |
| Clusia multiflora Kunth                                   | 1 |   |   |   |

|                                                                 |   |
|-----------------------------------------------------------------|---|
| <i>Cyathea parvifolia</i> Sodiro                                | 1 |
| <i>Cybianthus pastensis</i> (Mez) G. Agostini                   | 1 |
| <i>Cynanchum tenellum</i> L. f.                                 | 1 |
| <i>Dendrophthora lindeniana</i> Tiegh.                          | 1 |
| <i>Diplostegium foliosissimum</i> S. F. Blake                   | 1 |
| <i>Diplostegium jelskii</i> Hieron.                             | 1 |
| <i>Ditassa longiloba</i> Benth.                                 | 1 |
| <i>Elaeagia ecuadorensis</i> Steyerm.                           | 1 |
| <i>Elaphoglossum antisanae</i> (Sodiro) C. Chr.                 | 1 |
| <i>Elaphoglossum dendricola</i> (Baker) H. Christ               | 1 |
| <i>Elaphoglossum melancholicum</i> Vareschi                     | 1 |
| <i>Elaphoglossum tectum</i> (Humb. & Bonpl. ex Willd.) T. Moore | 1 |
| <i>Epidendrum frigidum</i> Linden ex Lindl.                     | 1 |
| <i>Epidendrum macrostachyum</i> Lindl.                          | 1 |
| <i>Escaellonia paniculata</i> (Ruiz & Pav.) Roem. & Schult.     | 1 |
| <i>Euphorbia repens</i> K. Koch                                 | 1 |
| <i>Fernandezia crystallina</i> (Lindl.) M.W.Chase               | 1 |
| <i>Fernandezia theodorii</i> M.W. Chase                         | 1 |
| <i>Frangula granulosa</i> (Ruiz & Pav.) Grubov.                 | 1 |
| <i>Freziera karsteniana</i> (Szyszyl.) Kobuski                  | 1 |
| <i>Gaultheria vaccinioides</i> Griseb. ex Wedd.                 | 1 |
| <i>Gentianella oellgaardii</i> J.S. Pringle                     | 1 |
| <i>Gentianella setipes</i> (Gilg) J. Pringle                    | 1 |
| <i>Geonoma orbignyana</i> Mart.                                 | 1 |
| <i>Geranium chilloense</i> Willd. ex Kunth                      | 1 |
| <i>Geum peruvianum</i> Focke                                    | 1 |
| <i>Graffenrieda harlingii</i> Wurdack                           | 1 |
| <i>Gunnera pilosa</i> Kunth                                     | 1 |
| <i>Guzmania squarrosa</i> (Mez & Sodiro) L.B.Sm. ex Pittendr.   | 1 |
| <i>Halenia gigantea</i> C.K.Allen                               | 1 |
| <i>Halenia sphagnicola</i> Gilg                                 | 1 |
| <i>Hedyosmum cumbalense</i> H. Karst.                           | 1 |
| <i>Hedyosmum goudotianum</i> Solms                              | 1 |
| <i>Hedyosmum sprucei</i> Solms                                  | 1 |
| <i>Heppiella verticillata</i> (Cav.) Cuatrec.                   | 1 |
| <i>Hieronyma duquei</i> Cuatrec.                                | 1 |
| <i>Huperzia binervia</i> (Herter) B. Øllg.                      | 1 |
| <i>Huperzia reflexa</i> (Lam.) Trevis                           | 1 |
| <i>Hydrocotyle hitchcockii</i> Rose ex Mathias                  | 1 |
| <i>Hyeronima macrocarpa</i> Müll. Arg.                          | 1 |
| <i>Hypericum chamaemyrtus</i> Triana & Planch.                  | 1 |
| <i>Hypochoeris chillensis</i> (Kunth) Hieron.                   | 1 |
| <i>Ilex andicola</i> Loes.                                      | 1 |
| <i>Ilex gabinetensis</i> Cuatrec.                               | 1 |
| <i>Ilex rimbachii</i> Standl.                                   | 1 |
| <i>Juncus arcticus</i> Willd.                                   | 1 |
| <i>Lellingeria major</i> (Copel.) A.R. Sm. & R.C. Moran         | 1 |
| <i>Lepanthes flexuosa</i> Luer                                  | 1 |
| <i>Lycopodium vestitum</i> Desv. ex Poir.                       | 1 |
| <i>Malaxis andicola</i> (Ridl.) Kuntze                          | 1 |
| <i>Meriania furvanthera</i> Wurdack                             | 1 |
| <i>Meriania maguirei</i> Wurdack                                | 1 |
| <i>Meriania rigida</i> (Benth.) Triana                          | 1 |
| <i>Mezobromelia fulgens</i> L.B. Sm.                            | 1 |
| <i>Miconia hutchisonii</i> Wurdack                              | 1 |
| <i>Miconia squamulosa</i> Triana                                | 1 |
| <i>Miconia theaezans</i> (Bonpl.) Cogn.                         | 1 |
| <i>Mikania stuebelii</i> Hieron.                                | 1 |
| <i>Monnina conferta</i> Ruiz & Pav.                             | 1 |
| <i>Monnina decurrens</i> Ferreyra                               | 1 |
| <i>Monnina hirta</i> (Bonpl.) B. Eriksen                        | 1 |
| <i>Monticalia pulchella</i> (Kunth) C. Jeffrey                  | 1 |
| <i>Myrcianthes rhopaloides</i> (Kunth) McVaugh                  | 1 |
| <i>Myrteola acerosa</i> (O. Berg) Burret                        | 1 |
| <i>Nassella pubiflora</i> (Trin. & Rupr.) E. Desv.              | 1 |
| <i>Ocotea infrafoveolata</i> van der Werff                      | 1 |
| <i>Oreocallis grandiflora</i> (Lam.) R. Br.                     | 1 |
| <i>Oreopanax discolor</i> (Kunth) Decne. & Planch.              | 1 |
| <i>Oreopanax rosei</i> Hams                                     | 1 |
| <i>Oritrophium repens</i> (Kunth) Cuatrec.                      | 1 |
| <i>Oxalis fendleri</i> Lourteig                                 | 1 |



|                                                                |   |   |
|----------------------------------------------------------------|---|---|
| <i>Panicum pantrichum</i> Hack.                                | 1 |   |
| <i>Paspalum candidum</i> (Flüggé) Kunth                        | 1 |   |
| <i>Passiflora cumbalensis</i> (H. Karst.) Harms                | 1 |   |
| <i>Pennisetum bambusiforme</i> (E.Fourn.) B.D.Jacks.           | 1 |   |
| <i>Pennisetum clandestinum</i> Hochst. ex Chiov.               | 1 |   |
| <i>Peperomia rotundata</i> Kunth                               | 1 |   |
| <i>Persea brevipes</i> Meisn.                                  | 1 |   |
| <i>Persea bullata</i> Kopp                                     | 1 |   |
| <i>Pityrogramma pearcei</i> (T. Moore) Domin                   | 1 |   |
| <i>Plagiogyria semicordata</i> (C. Presl) H. Christ            | 1 |   |
| <i>Podocarpus oleifolius</i> D. Don                            | 1 |   |
| <i>Polygala paniculata</i> L.                                  | 1 |   |
| <i>Polylepis weberbaueri</i> Pilg.                             | 1 |   |
| <i>Prunus opaca</i> (Benth.) Walp.                             | 1 |   |
| <i>Puya bicolor</i> Mez                                        | 1 |   |
| <i>Puya exigua</i> Mez                                         | 1 |   |
| <i>Puya glaucovirens</i> Mez                                   | 1 |   |
| <i>Rhynchospora glomerata</i> (L.) Vahl                        | 1 |   |
| <i>Rhynchospora polyphylla</i> (Vahl) Vahl                     | 1 |   |
| <i>Rhynchospora tamalancensis</i> Gómez-Laur. & W. W. Thomas   | 1 |   |
| <i>Ribes bogotatum</i> Jancz.                                  | 1 |   |
| <i>Ribes ecuadorensis</i> Jancz.                               | 1 |   |
| <i>Ribes microphyllum</i> Kunth                                | 1 |   |
| <i>Rubus floribundus</i> Kunth                                 | 1 |   |
| <i>Rubus laegaardii</i> Romolero                               | 1 |   |
| <i>Rubus megalococcus</i> Focke                                | 1 |   |
| <i>Rubus robustus</i> C. Presl                                 | 1 |   |
| <i>Smilax domingensis</i> Willd. Kunth                         | 1 |   |
| <i>Spherospermum cordifolium</i> Benth.                        | 1 |   |
| <i>Stelis concinna</i> Lindl.                                  | 1 |   |
| <i>Stenomesson aurantiacum</i> (Kunth) Herb.                   | 1 |   |
| <i>Stevia elatior</i> Kunth                                    | 1 |   |
| <i>Sticherus simplex</i> (Desv.) Ching                         | 1 |   |
| <i>Themistoclesia epiphytica</i> A.C. Sm.                      | 1 |   |
| <i>Tillandsia biflora</i> Ruiz & Pav.                          | 1 |   |
| <i>Tillandsia complanata</i> Benth.                            | 1 |   |
| <i>Trachypogon spicatus</i> (L.f.) Kuntze                      | 1 |   |
| <i>Triglochin scilloides</i> (Poir.) Mering & Kadereit         | 1 |   |
| <i>Valeriana hirtella</i> Kunth                                | 1 |   |
| <i>Vitekorchis excavata</i> (Lindl.) Romowicz & Szlach.        | 1 |   |
| <i>Weinmannia anisophylla</i> Standl. & L.O. Williams          | 1 |   |
| <i>Weinmannia jelskii</i> Zahlbr.                              | 1 |   |
| <i>Weinmannia karsteniana</i> Szyszyl.                         | 1 |   |
| <i>Weinmannia lechleriana</i> Engl.                            | 1 |   |
| <i>Weinmannia pubescens</i> Kunth                              | 1 |   |
| <i>Woodsia montevidensis</i> (Spreng.) Hieron.                 | 1 |   |
| <i>Aa leucantha</i> (Rchb.f.) Schltr.                          |   | 1 |
| <i>Diplostephium rangelii</i> Cuatrec.                         |   | 1 |
| <i>Diplostephium weddellii</i> S. F. Blake                     |   | 1 |
| <i>Halenia elata</i> Wedd.                                     |   | 1 |
| <i>Monnina aestuans</i> (L.f.) DC.                             |   | 1 |
| <i>Niphogeton colombiana</i> Mathias & Constance               |   | 1 |
| <i>Pentacalia carrikeri</i> (Cuatrec.) Cuatrec.                |   | 1 |
| <i>Pentacalia weinmannifolia</i> (Cuatrec.) Cuatrec.           |   | 1 |
| <i>Senecio subbrunclatus</i> (Wedd.) Greenm.                   |   | 1 |
| <i>Symplocos rigidissima</i> Brand                             |   | 1 |
| <i>Valeriana engleriana</i> Höck                               |   | 1 |
| <i>Valeriana karstenii</i> Briq.                               |   | 1 |
| <i>Valeriana vetasana</i> Killip                               |   | 1 |
| <i>Aragoa cupressina</i> Kunth                                 |   | 1 |
| <i>Aulonemia trianae</i> (Munro) McClure                       |   | 1 |
| <i>Chusquea acuminatissima</i> (Munro) L.G.Clark (Munro) Pilg. |   | 1 |
| <i>Elaphoglossum affine</i> (M. Martens & Galeotti) T. Moore   |   | 1 |
| <i>Epidendrum chortophyllum</i> Schltr.                        |   | 1 |
| <i>Fleischmannia pycnocephala</i> (Less.) R.M.King & H.Rob.    |   | 1 |
| <i>Frangula goudotiana</i> (Triana & Planch.) Grubov           |   | 1 |
| <i>Lupinus bogotensis</i> Benth.                               |   | 1 |
| <i>Miconia nivalis</i> Wurdack                                 |   | 1 |
| <i>Scrobicaria ilicifolia</i> (L. f.) B. Nord.                 |   | 1 |
| <i>Alansmia lanigera</i> (Desv.) Moguel & M. Kessler           |   | 1 |
| <i>Berberis stuebelii</i> Hieron.                              |   | 1 |

|                                                                   |   |   |   |
|-------------------------------------------------------------------|---|---|---|
| <i>Cardamine ovata</i> Benth.                                     | 1 |   |   |
| <i>Carex stricta</i> Lam.                                         | 1 |   |   |
| <i>Disterigma humboldtii</i> (Klotzsch) Nied.                     | 1 |   |   |
| <i>Drymaria cordata</i> (L.) Willd. ex Roem. & Schult.            | 1 |   |   |
| <i>Elaphoglossum cuspidatum</i> (Willd.) T. Moore                 | 1 |   |   |
| <i>Ilex colombiana</i> Cuatrec.                                   | 1 |   |   |
| <i>Jamesonia robusta</i> H. Karst.                                | 1 |   |   |
| <i>Myosotis azorica</i> H. C. Watson                              | 1 |   |   |
| <i>Oreopanax ellsworthii</i> Cuatrec.                             | 1 |   |   |
| <i>Pentacalia leioclada</i> (Cuatrec.) Cuatrec.                   | 1 |   |   |
| <i>Ribes leptostachyum</i> Benth.                                 | 1 |   |   |
| <i>Schefflera ferruginea</i> (Willd. ex Schult.) Harms            | 1 |   |   |
| <i>Symplocos venulosa</i> Cuatrec.                                | 1 |   |   |
| <i>Valeriana tatamana</i> Killip                                  | 1 |   |   |
| <i>Berberis psilopoda</i> Turcz.                                  |   | 1 |   |
| <i>Espeletia barclayana</i> Cuatrec.                              |   | 1 |   |
| <i>Espeletia incana</i> Cuatrec.                                  |   | 1 |   |
| <i>Espeletia summapacis</i> Cuatrec.                              |   | 1 |   |
| <i>Espeletia uribei</i> Cuatrec.                                  |   | 1 |   |
| <i>Huperzia diana</i> (Herter) B. Øllg.                           |   | 1 |   |
| <i>Lachemilla pinnata</i> (Ruiz & Pav.) Rothm.                    |   | 1 |   |
| <i>Niphogeton cleefii</i> Mathias & Constance                     |   | 1 |   |
| <i>Niphogeton josei</i> Mathias & Constance                       |   | 1 |   |
| <i>Pentacalia ledifolia</i> (Kunth) Cuatrec.                      |   | 1 |   |
| <i>Ribes columbianum</i> Cuatrec.                                 |   | 1 |   |
| <i>Valeriana stenophylla</i> Killip                               |   | 1 |   |
| <i>Baccharis teindalensis</i> Kunth                               |   |   | 1 |
| <i>Uncinia tenuis</i> Poepp. ex Kunth                             |   |   | 1 |
| <i>Belonanthus hispida</i> (Wedd.) Graebn.                        |   |   | 1 |
| <i>Chusquea nana</i> (L.G.Clark) L.G.Clark                        |   |   | 1 |
| <i>Halenia umbellata</i> (Ruiz & Pav.) Gilg                       |   |   | 1 |
| <i>Huperzia columnaris</i> B. Øllg.                               |   |   | 1 |
| <i>Isidrogalvia sessiliflora</i> (Hook.) Cruden                   |   |   | 1 |
| <i>Lysipomia vitreola</i> McVaugh                                 |   |   | 1 |
| <i>Miconia rotundifolia</i> (D. Don) Naudin                       |   |   | 1 |
| <i>Oxalis eriolepis</i> Wedd.                                     |   |   | 1 |
| <i>Acaulimalva acaulis</i> (Dombey ex Cav.) Krapov.               |   |   | 1 |
| <i>Ageratina aristeguietii</i> R. M. King & H. Rob.               |   |   | 1 |
| <i>Agrostis meridensis</i> Luces                                  |   |   | 1 |
| <i>Agrostis venezuelana</i> Mez                                   |   |   | 1 |
| <i>Alloispermum caracasana</i> (Kunth) H. Rob.                    |   |   | 1 |
| <i>Altensteinia nubigena</i> (Rchb.f.) Rchb.f.                    |   |   | 1 |
| <i>Athyrium filix-femina</i> (L.) Roth                            |   |   | 1 |
| <i>Berberis prolifica</i> Pittier                                 |   |   | 1 |
| <i>Blakiella bartsiifolia</i> (S.F.Blake) Cuatrec.                |   |   | 1 |
| <i>Calamagrostis chaseae</i> Luces                                |   |   | 1 |
| <i>Calceolaria perfoliata</i> L.f.                                |   |   | 1 |
| <i>Carex phalaroides</i> Kunth                                    |   |   | 1 |
| <i>Castilleja trujillensis</i> Pennell                            |   |   | 1 |
| <i>Draba chionophila</i> S. F. Blake                              |   |   | 1 |
| <i>Draba funkiana</i> Planch. ex O.E.Schulz                       |   |   | 1 |
| <i>Elaphoglossum appressum</i> Mickel                             |   |   | 1 |
| <i>Elaphoglossum dombeyanum</i> (Fée) T.B. Moore & Houlston       |   |   | 1 |
| <i>Espeletia aurantia</i> Aristeg.                                |   |   | 1 |
| <i>Espeletia semiglobulata</i> Cuatrec.                           |   |   | 1 |
| <i>Gamochaeta paramora</i> (S.F.Blake) Anderb.                    |   |   | 1 |
| <i>Gomphichis traceyae</i> Rolfe                                  |   |   | 1 |
| <i>Gomphichis viscosa</i> (Rchb.f.) Schltr.                       |   |   | 1 |
| <i>Halenia subinvoluta</i> Gilg                                   |   |   | 1 |
| <i>Hieracium erianthum</i> Kunth                                  |   |   | 1 |
| <i>Hierochloa redolens</i> (Vahl) Roem. & Schult.                 |   |   | 1 |
| <i>Hymenophyllum polyanthos</i> Sw.                               |   |   | 1 |
| <i>Hypericum thesiifolium</i> Kunth                               |   |   | 1 |
| <i>Lappula squarrosa</i> (Retz.) Dumort.                          |   |   | 1 |
| <i>Lupinus jahnii</i> Rose ex Pittier                             |   |   | 1 |
| <i>Lysipomia bourgoinii</i> Ernst                                 |   |   | 1 |
| <i>Oreopanax reticulatus</i> (Willd ex Schult) Deene & Planch. ME |   |   | 1 |
| <i>Oritrophium venezuelense</i> (Steyerm.) Cuatrec.               |   |   | 1 |
| <i>Pentacalia sclerosa</i> (Cuatrec.) Cuatrec.                    |   |   | 1 |
| <i>Pentacalia tunamensis</i> (Cuatrec.) Cuatrec.                  |   |   | 1 |
| <i>Phoradendron undulatum</i> (Pohl ex DC.) Eichler               |   |   | 1 |

|                                                         |   |   |   |
|---------------------------------------------------------|---|---|---|
| <i>Polylepis sericea</i> Wedd.                          | 1 |   |   |
| <i>Ranunculus bonariensis</i> Poir.                     | 1 |   |   |
| <i>Ribes canescens</i> Pittier                          | 1 |   |   |
| <i>Salvia rubescens</i> Kunth                           | 1 |   |   |
| <i>Serpocaulon lasiopus</i> (Klotzsch) A.R. Sm.         | 1 |   |   |
| <i>Siphocampylus sceptrum</i> Decne. ex Linden          | 1 |   |   |
| <i>Solanum colombianum</i> Dunal                        | 1 |   |   |
| <i>Thalictrum podocarpum</i> Kunth ex DC.               | 1 |   |   |
| <i>Vaccinium meridionale</i> Sw.                        | 1 |   |   |
| <i>Valeriana scandens</i> Loeffl.                       | 1 |   |   |
| <i>Calceolaria penlandii</i> Pennell                    |   | 1 |   |
| <i>Cardamine jamesonii</i> Hook.                        |   | 1 |   |
| <i>Aetheolaena pichinchensis</i> (Cuatrec.) B. Nord.    |   |   | 1 |
| <i>Asplenium oellgaardii</i> Stolze                     |   |   | 1 |
| <i>Bartsia pumila</i> Benth.                            |   |   | 1 |
| <i>Berberis multiflora</i> Benth.                       |   |   | 1 |
| <i>Bomarea perglabra</i> Harling & Neuendorf            |   |   | 1 |
| <i>Bowlesia lobata</i> Ruiz & Pav.                      |   |   | 1 |
| <i>Caiophora contorta</i> (Desr.) C. Presl              |   |   | 1 |
| <i>Calceolaria crenata</i> Lam.                         |   |   | 1 |
| <i>Calceolaria lamiifolia</i> Kunth                     |   |   | 1 |
| <i>Carex umbellata</i> Willd.                           |   |   | 1 |
| <i>Descurainia myriophylla</i> (Willd. ex DC.) R.E. Fr. |   |   | 1 |
| <i>Diplostegium glutinosum</i> S.F.Blake                |   |   | 1 |
| <i>Elaphoglossum paleaceum</i> (Hook. & Grey.) Sledge   |   |   | 1 |
| <i>Ephedra americana</i> Humb. & Bonpl. ex Willd.       |   |   | 1 |
| <i>Festuca densipaniculata</i> E.B. Alexeev             |   |   | 1 |
| <i>Festuca sodiroana</i> Hack. ex E.B. Alexeev          |   |   | 1 |
| <i>Gnaphalium cheiranthifolium</i> Bertero ex Lam.      |   |   | 1 |
| <i>Gnaphalium coarctatum</i> Willd.                     |   |   | 1 |
| <i>Hieracium sprucei</i> Arv.-Touv.                     |   |   | 1 |
| <i>Huperzia lindenii</i> (Spring) Trevis.               |   |   | 1 |
| <i>Hypericum caespitosum</i> Cham. & Schldl.            |   |   | 1 |
| <i>Jungia rugosa</i> Less.                              |   |   | 1 |
| <i>Lachemilla paludicola</i> (Rothm.) Rothm.            |   |   | 1 |
| <i>Lupinus ulbrichianus</i> C.P. Sm.                    |   |   | 1 |
| <i>Lysipomia acaulis</i> Kunth                          |   |   | 1 |
| <i>Muhlenbergia peruviana</i> (P. Beauv.) Steud.        |   |   | 1 |
| <i>Oxalis corniculata</i> L.                            |   |   | 1 |
| <i>Oxalis mollis</i> Kunth                              |   |   | 1 |
| <i>Plantago lanceolata</i> L.                           |   |   | 1 |
| <i>Poa aequatoriensis</i> Hack.                         |   |   | 1 |
| <i>Polylepis reticulata</i> Hieron.                     |   |   | 1 |
| <i>Potentilla dombeyi</i> Nestl.                        |   |   | 1 |
| <i>Taraxacum vulgare</i> (Lam.) Schrank                 |   |   | 1 |
| <i>Urtica leptophylla</i> Kunth                         |   |   | 1 |
| <i>Veronica arvensis</i> L.                             |   |   | 1 |
| <i>Vulpia australis</i> (Nees) Blom                     |   |   | 1 |
| <i>Aetheolaena caldasensis</i> (Cuatrec.) B.Nord.       |   |   | 1 |
| <i>Aphanactis barclayae</i> H. Rob.                     |   |   | 1 |
| <i>Chusquea villosa</i> (L.G.Clark) L.G.Clark           |   |   | 1 |
| <i>Draba spruceana</i> Wedd.                            |   |   | 1 |
| <i>Festuca imbaburensis</i> Stancik                     |   |   | 1 |
| <i>Huperzia hohenackeri</i> (Herter) Holub              |   |   | 1 |
| <i>Isoetes killipii</i> C. V. Morton                    |   |   | 1 |
| <i>Lachemilla perryana</i> (Rothm.) Rothm.              |   |   | 1 |
| <i>Lasiocephalus puracensis</i> (Cuatrec.) Cuatrec.     |   |   | 1 |
| <i>Myrosmodes nubigenum</i> Rehb.f.                     |   |   | 1 |
| <i>Oritrophium llanganatense</i> Sklenár & H. Rob.      |   |   | 1 |
| <i>Rostkovia magellanica</i> (Lam.) Hook. f.            |   |   | 1 |
| <i>Poa trivialis</i> L.                                 |   |   | 1 |
| <i>Arenaria tetragyna</i> Willd. ex Schldl.             |   |   | 1 |
| <i>Elaphoglossum rimbachii</i> (Sodiuro) H. Christ      |   |   | 1 |
| <i>Senecio rufescens</i> DC.                            |   |   | 1 |
